# Supplementary material for: Sphingosine 1-phosphate receptor 1 signaling in macrophages reduces atherosclerosis in LDL receptor–deficient mice
Source: PubMed Central journal article supplement (PMC11665566; doi:10.1172/jci.insight.158127), 2024-11-12
Supplement: jciinsight-9-158127-s008.pdf [file jciinsight-9-158127-s008.pdf]

1 **Poti et al.: Sphingosine-1-Phosphate (S1P) receptor type 1 signaling in**  
2 **macrophages reduces atherosclerosis in LDL receptor-deficient mice**  
3

4 **SUPPLEMENTAL MATERIALS**

5  
6 **METHODS**

7 Reagents – Compound 79-6 and bortezomib were obtained from Selleck Chemicals  
8 (München, Germany). GSK690693 and bafilomycin were from Tocris Bioscience  
9 (Bristol, GB). Cell culture reagents including DMEM, RPMI1640, non-essential amino  
10 acids and sodium pyruvate were from Lonza (Wuppertal, Germany). KRP-203 (2-  
11 amino-2-{3-[4-(3-benzyloxy-phenylsulfanyl)-2-chloro-phenyl]-ethyl}-propan-1,3-diol  
12 hydrochloride) and KRP-203-phosphate were provided by Novartis (Basel,  
13 Switzerland). Fetal calf serum (FCS) was from PAA Laboratories, Cölbe, Germany.  
14 Unless indicated otherwise, all other chemicals were from Sigma (Deisenhofen,  
15 Germany), and were of highest purity available.

16 Animals – *C57Bl/6J-Gt(ROSA)26Sor<sup>tm1(S1pr1)Geno</sup>* mouse (referred to as *S1pr1-KI*) was  
17 generated by Genoway (Lyon, France) by knocking in the floxed murine *S1pr1* (*S1p1*)  
18 transgene into ES cells. Briefly, the murine *S1p1* cDNA controlled by the synthetic CAG  
19 promoter was engineered to contain a neomycin-stop cassette between promoter and  
20 the cDNA. Hence, the *S1p1* cDNA is only expressed following Cre-mediated removal  
21 of the cassette. The construct was introduced into the Rosa 26 locus using the  
22 GenOway proprietary targeting vector. To achieve S1P<sub>1</sub> overexpression in monocytic  
23 cells, *S1pr1<sup>f/stop/f</sup>* were crossed to B6.129P2-*Lyz2<sup>tm1(cre)lfo</sup>/J* mice (purchased from  
24 Jackson Laboratories, Bar Harbor, ME, [1]) or B6.129P2-*Adgre1<sup>tm1(cre)Kpf</sup>* (gift of Klaus  
25 Pfeffer, University of Düsseldorf, Germany [2]) to yield *S1pr1<sup>f/stop/f</sup>-Lyz2<sup>tm1(cre)lfo</sup>/J* mice  
26 (referred to as *S1pr1-LysMCre*) or *S1pr1<sup>f/stop/f</sup>-Adgre1<sup>tm1(cre)Kpf</sup>* (referred to as *S1pr1-*

1 *F4/80Cre*). Genotyping was done by PCR using tail or ear biopsies. Animals were  
2 maintained in individually ventilated cages under a 12-hour light/12-hour dark cycle  
3 with free access to water and regular chow diet (66% carbohydrate, 12% fat, 22%  
4 protein).

5 Female *Ldlr*<sup>-/-</sup> mice on a C57BL/6J background (B6.129S7-*Ldlr*<sup>tm1Her</sup>/J, [3], referred to  
6 as *Ldlr*<sup>-/-</sup>) were purchased from Jackson Laboratories. *Ldlr*<sup>-/-</sup> crossed to apoM-lacking  
7 *Apom*<sup>tm1Cchr</sup> mice backcrossed at least 7 times onto a C57B6/J background ([4] referred  
8 to as *Apom*<sup>-/-</sup>/*Ldlr*<sup>-/-</sup>, 6 to 8 week of age) were provided by C. Christoffersen. To induce  
9 bone marrow aplasia, *Ldlr*<sup>-/-</sup> mice (6-8 week of age) were exposed to a single total dose  
10 of 11 Gy total body irradiation 1 day before the transplantation. Bone marrow (BM) was  
11 isolated by flushing femurs and tibias from female *S1pr1-KI*, *S1pr1-LysMCre* or *S1p1-*  
12 *F4/80Cre* mice with phosphate-buffered saline (PBS) and single-cell suspensions were  
13 prepared by passing the cells through a 70 µm cell strainer. Irradiated recipients  
14 received 5.0 x 10<sup>6</sup> cells by intravenous injection into the tail vein. The hematological  
15 chimerism of transplanted animals was determined in genomic DNA from blood  
16 leukocytes 4 weeks after transplantation. Thereafter, animals were put on Western-  
17 type diet (0.5% cholesterol, 21% fat (corn oil, Research Diets D12107, manufactured  
18 by Altromin, Lage, Germany) for 14 weeks. At the end of the treatment period mice  
19 were sacrificed by exsanguination by heart puncture or cervical dislocation, both under  
20 anesthesia (5.0% isoflurane introduced via a vaporizer) and tissues were collected for  
21 further analysis.

22 C57BL/6J mice (referred to as wild type (WT)) were purchased from Charles River  
23 Laboratories (Sulzfeld, Germany). Mice (8 – 10 weeks, ca. 25 g, female) received twice  
24 a week i.p. injections of 0.075 mg KRP-203 (approx. 3.0 mg/kg/day) or the same  
25 volume (0.1 mL) of saline (control group). At the end of the treatment period mice were  
26 bled by heart puncture under complete anesthesia, peritoneal macrophages were

1 isolated and blood was collected for further analysis. All experiments conformed to the  
2 guidelines from directive 2010/63/EU and were approved by the local animal protection  
3 authorities (LANUV, Recklinghausen, Germany, permit Nr. 84-02.04.2015.A505 and  
4 81-02.04.2022.A329).

5 Lipid and lipoprotein isolation, modification and determination – Low and high density  
6 lipoproteins (LDL and HDL) were isolated from the pooled plasma of healthy blood  
7 donors by a discontinuous potassium bromide gradient centrifugation ( $d=1.125-1.210$   
8  $g/mL$  for LDL and  $d=1.125-1.210 g/mL$  for HDL). LDL was acetylated by the method of  
9 Fraenkel-Conrat [5] with minor modifications. Briefly, equal volumes of LDL and  
10 saturated sodium acetate were continuously mixed in ice-water bath, while glacial  
11 acetic acid ( $1.5 \mu L/1.0 mg$  total LDL protein) was added in  $1,5 \mu L$  aliquots every 5  
12 minutes. After addition acetic anhydride mixture was stirred for additional 30 min and  
13 dialyzed for 24 h at  $4^{\circ}C$  against PBS (pH 7.4). Apolipoprotein A-I (ApoA-I) isolated from  
14 human plasma was obtained from Calbiochem, (Merck, Darmstadt, Germany). Mouse  
15 plasma lipoproteins were isolated by sequential ultracentrifugation from  $60 \mu L$  of  
16 plasma at densities ( $d$ ) of  $d < 1.006 g/mL$  (VLDL),  $1.006 \leq d \leq 1.063 g/mL$  (IDL, LDL) and  
17  $d > 1.063 g/mL$  (HDL) as described [6]. Cholesterol and triglyceride concentrations in  
18 plasma or isolated lipoprotein fractions were determined enzymatically using  
19 colorimetric assay kits (Roche Diagnostics, Mannheim, Germany). Plasma S1P levels  
20 were determined by liquid-chromatography tandem mass spectrometry as published  
21 previously [7].

22 Histology and Lesion Analysis - Atherosclerosis in the aortic root and brachiocephalic  
23 artery (BCA) was determined in a blinded fashion following the current  
24 recommendations of the AHA [8] and as previously described [9]. In brief, aortic roots  
25 and BCAs were removed under a dissecting microscope, embedded in O.C.T.  
26 (ThermoFisher Scientific, Schwerte, Germany) and snap-frozen at  $-80^{\circ}C$ . Cross

1 sectional lesion areas at the aortic root were quantified in 5 oil red O-stained sections  
2 in the region beginning at the end of the aortic sinus and extending into the ascending  
3 aorta. Each of the five sections were separated by 50  $\mu$ m. In addition, atherosclerotic  
4 lesions luminal to the internal elastic lamina were quantified in 3 oil red O-stained  
5 sections per BCA. For both, aortic root and BCA, mean lesion sizes were calculated  
6 for each animal. Histological stainings were performed on single sections directly  
7 adjacent to oil red O-stained tissue sections. Macrophage content of lesions was  
8 determined by immunohistochemistry using specific antibodies against CD68 (AbD  
9 Serotec, Germany). Total collagen fiber content was analyzed in PicroSirius Red  
10 stained sections by polarization microscopy (Zeiss AxioObserver). Movat pentachrome  
11 staining to assess lesion quality was performed according to the manufacturer's  
12 protocol (Morphisto, Germany). All lesions were photographed and analyzed using  
13 AxioVision KS400 image analysis (Carl Zeiss Microscopy GmbH, Germany).

14 *Lesion apoptosis and efferocytosis quantitation* - Apoptosis and efferocytosis in the  
15 aortic root cryosections were analyzed by confocal immunofluorescence microscopy.  
16 Serial 10  $\mu$ m thick proximal aortic cryosections were stained with TUNEL (Tdt-  
17 Mediated dUTP Nick end Labeling) using the TMR red detection kit (Roche) according  
18 to the manufacturer instructions. Briefly, sections were fixed with 2% diluted neutral  
19 buffered formalin solution, permeabilized with a fresh prepared buffer containing Triton  
20 X-100 (0.1% v/v) in sodium citrate (0.1% w/v) and stained with TUNEL TMR red for 1  
21 h at 37°C. Subsequently, sections were blocked with BSA solution (1.0 % v/v in PBS)  
22 and then incubated with anti-mouse MOMA-2 rat antibody (1:100 (v/v)), Santa Cruz  
23 Biotechnology, Heidelberg, Germany), overnight at 4°C. After washing, sections were  
24 incubated with goat anti rat IgG DyLight 488 (1:300 (v/v), Novus Biologicals,  
25 Centennial, CO) for 1 h at room temperature and protected from light. Slides were  
26 mounted with 4',6-diamidino-2-phenylindole (DAPI) containing mounting media for

1 nuclear counterstaining. Images were acquired using the Leica TCS SP2 confocal  
2 microscope (Leica, Wetzlar, Germany), and then processed by at least two different  
3 operators using Fiji open-source image processing software [10]. The TUNEL positive  
4 nuclei were quantitated and normalized to the lesion area. In lesions where the TUNEL  
5 stain was condensed, fragmented, and/or faded, the average area of healthy DAPI-  
6 stained nuclei was used as reference to quantitate TUNEL positive signals. The free  
7 versus macrophage-associated TUNEL stain in the same sections were quantitated as  
8 described [11-13] and accordingly expressed. TUNEL positive nuclei were counted as  
9 free when they were not associated with or in close proximity to viable macrophages  
10 that were detected as clearly MOMA-2-stained macrophage cytoplasm surrounding a  
11 DAPI-stained nucleus.

12 Neutrophil staining of aortic root sections - Neutrophils were stained by a standard  
13 cytochemical method based on the Naphthol AS-D Chloroacetate Esterase (NACE)  
14 reaction, which is specific for cells of the granulocyte lineage and absent in monocytes  
15 or lymphocytes [14,15]. Cryosections of aortic root were stained according to the  
16 manufacturer's instructions (Sigma). Briefly, formalin fixed air-dried cryosections and  
17 all the reagents were warmed at 37°C. Sections were sequentially exposed to different  
18 staining solutions, buffers and rinsing steps. At the end, nuclei were counterstained  
19 with Mayer's hematoxylin and glass slides mounted with an aqueous mounting media.  
20 Images were captured with a Nikon Optiphot 2 microscope, equipped with DS-U2  
21 camera system, and analyzed with the Fiji (ImageJ) software [10] by two independent  
22 operators.

23 Leukocyte differential count and subtyping – Differential leukocyte count was  
24 performed on an automated hematology analyzer (XN1000, Sysmex Deutschland  
25 GmbH, Norderstedt, Germany) in a routine hospital laboratory. White blood cell  
26 subtyping was performed by flow cytometry. Briefly, whole blood was anti-coagulated

1 with citrate, incubated for 30 minutes with fluorescein isothiocyanate (FITC)-,  
2 phycoerythrin (PE)-, allophycocyanin (APC)- or allophycocyanin/cyanin 7 (APC/Cy7)-  
3 conjugated antibodies against CD11b, Ly6g, F4/80, CD193, CD3, CD4, CD8, B220  
4 (each 5.0 µg/mL), and fixed for 30 minutes with 1% formaldehyde in phosphate  
5 buffered saline (PBS). Thereafter, cells were centrifuged for 10 minutes at 1700 rpm  
6 and erythrocytes were lysed in a buffer containing 0.15 mol/L NH<sub>4</sub>Cl, 10 mmol/L  
7 NaHCO<sub>3</sub>, 0.1 mmol/L EDTA (pH 7.4). The remaining cells were washed twice in PBS  
8 and analyzed on a CyFlow Space flow cytometer (Sysmex Partec, Münster, Germany)  
9 equipped with a 488 nm argon laser.

10 Isolation of macrophages and neutrophils - Peritoneal leukocytes were isolated by  
11 peritoneal lavage with ice-cold PBS as described previously [16,17]. Cells were  
12 suspended in DMEM containing FBS (10.0 % v/v) and 2 mmol/L glutamine and were  
13 either used for flow cytometry or seeded in a 12- 24- or 96-well cell culture plate at a  
14 required density. After 2 h non-adherent cells were removed, and remaining  
15 macrophages were harvested and analyzed or used for further experiments. For  
16 isolation of neutrophils, femurs and tibiae harvested from sacrificed mice were flushed  
17 out with PBS without Ca<sup>2+</sup>/Mg<sup>2+</sup>. After lysis of erythrocytes the cell suspension was  
18 washed, centrifuged, and incubated in PBS on ice for 30 minutes. Subsequently, cells  
19 were resuspended in the MojoSort™ buffer (BioLegend, SanDiego, CA) adapted for  
20 cell separation using magnetic nanobeads. The cell count was adjusted to 1 x 10<sup>8</sup>/ml  
21 and the neutrophil-negative magnetic sorting was carried out using MojoSort™ Mouse  
22 Neutrophil Isolation Kit (BioLegend) exactly according to the supplier protocol.

23 Analysis of gene expression by real-time quantitative RT-PCR - Total RNA was  
24 isolated from peritoneal macrophages using Trizol reagent (ThermoFisher Scientific)  
25 according to manufacturer protocol. RNA was eluted in water and quantified using  
26 BioPhotometer (Eppendorf, Hamburg, Germany). The entire cDNA was synthesized

1 from 1.0 µg of total RNA using RevertAid H Minus First Strand cDNA Synthesis Kit  
2 (ThermoFisher Scientific). PCR products were detected using ABI7900ht sequence  
3 detection system (Applied Biosystems, Darmstadt, Germany) in a 384-well format,  
4 using SYBR™ Green PCR master mix (ThermoFisher Scientific). PCR primer  
5 sequences are shown in Table S1. Relative gene expression was calculated by  
6 applying the  $2^{-\Delta\Delta C_t}$  method.

7 *Analysis of gene expression by microarray and pathway analysis* - The peritoneal  
8 leukocytes were isolated as described above and seeded on a 24-well plate at density  
9  $4 \times 10^5$  cells/mL. After 2h non-adherent cells were removed and macrophages covered  
10 with RNeasy Lysis Buffer (RLT buffer, Qiagen, Venlo, The Netherlands). RNA was  
11 isolated using RNeasy Micro kit (Qiagen) according to the instruction of the  
12 manufacturer. The concentration and purity of RNA was analyzed on BioPhotometer.  
13 RNA integrity was assessed with the Agilent 2100 Bioanalyzer (Agilent Technologies  
14 Inc., Palo Alto, California). After cRNA labeling and hybridization to the Illumina HT-8  
15 expression bead chips, microarrays were scanned on an iScan array scanner (Illumina,  
16 SanDiego, CA) and raw array data were processed and background-subtracted in  
17 Illumina GenomeStudio. Further analysis was performed using the Chipster open-  
18 source platform [18]. Expression values were quantile normalized and log<sub>2</sub>-  
19 transformed using the Bioconductor package 'lumi' implemented in Chipster. Statistical  
20 comparison between the sample groups was done within Chipster using the empirical  
21 Bayes method [19] and the Benjamini-Hochberg (BH) multiple-testing correction of the  
22 raw p-values. FDR threshold of 5% ( $q < 0.05$ ) was used for filtering differentially  
23 expressed genes. The microarray data have been deposited in the ArrayExpress  
24 database at EMBL-EBI ([www.ebi.ac.uk/arrayexpress](http://www.ebi.ac.uk/arrayexpress)) under accession number.  
25 Pathway analysis to identify enriched pathways and processes was performed with the  
26 online software Metascape ([www.metascape.org](http://www.metascape.org)), using default parameters [20].

1 For genes with >2-fold upregulation in *S1pr1-LysMCre* mice, pathway and process  
2 enrichment analysis has been carried out with the following ontology sources: GO  
3 Biological Processes, KEGG Pathway, Reactome Gene Sets and CORUM. All genes  
4 in the genome have been used as the enrichment background. Terms with a p-value  
5 < 0.01, a minimum count of 3, and an enrichment factor > 1.5 (the enrichment factor is  
6 the ratio between the observed counts and the counts expected by chance) were  
7 collected and grouped into clusters based on their membership similarities. More  
8 specifically, p-values were calculated based on the accumulative hypergeometric  
9 distribution, and q-values were calculated using the Benjamini-Hochberg procedure to  
10 account for multiple testing.

11 *Chromatin immunoprecipitation (ChIP)* – Peritoneal leukocytes were seeded in 12-well  
12 plates at a density of  $2 \times 10^6$  cells/mL and non-adherent cells were removed by washing  
13 with PBS. In some experiments, peritoneal macrophages were exposed overnight to  
14 desmosterol (50.0  $\mu$ mol/L) in DMEM containing FBS (10.0 % (v/v)). Otherwise, the  
15 chromatin cross-linking was carried out directly. To this purpose, formaldehyde  
16 solution was added to the wells at the final concentration of 1.0 % (w/v) and incubated  
17 under shaking for 10 min. Cross-linking was subsequently quenched by the addition of  
18 glycine to a final concentration of 0.15 mol/L. The cells were rinsed twice, collected by  
19 scrapping in the ice-cold PBS and pelleted by centrifuging at 290g for 5 min at 4 °C.  
20 Afterwards, cells were washed 2 x in PBS and the nuclei fraction was collected by  
21 centrifugation (850 x g, 5 min., 4°C) and flash frozen.

22 Chromatin digestion was accomplished enzymatically using micrococcal nuclease  
23 (Cell Signaling Technology, Frankfurt, Germany). Briefly, the nuclear pellet was  
24 resuspended up in ice-cold SimpleChIP® enzymatic cell lysis buffer A supplemented  
25 with protease inhibitor cocktail (Cell Signaling Technology) and dithiothreitol (0.5  
26 mmol/L), incubated for 10 minutes on ice and centrifuged (2000 x g, 5 minutes, 4°C).



1 Cells were washed in buffer B (1.0 mL), centrifuged again and resuspended in 0.1 mL  
2 of the cell lysis buffer B. The micrococcal nuclease (0.5  $\mu$ L) was added for 20 minutes  
3 and the digestion was stopped using EDTA (0.5 mol/L). Thereafter, samples were  
4 spinned down and the pellet was resuspended in RIPA buffer (Tris-HCl 10 mmol/L pH  
5 8.0, 1.0 mmol/L EDTA, 140 mmol/L NaCl, 1% (v/v) Triton X-100, 0.1% SDS (v/v), and  
6 0.1% (w/v) Na-deoxycholate (w/v)) and sonicated on ice (3 x 20 sec).

7 Immunoprecipitation was performed overnight at 4°C using goat polyclonal antibody  
8 against IRF8 (ThermoFisher Scientific) and rabbit polyclonal antibodies against PU.1  
9 and LXR $\alpha/\beta$  (both SantaCruz Biotechnology) coupled to Dynabeads protein G  
10 (ThermoFisher Scientific). Antibody coupling was performed exactly as described by  
11 Blecher-Gonen et al. [21]. Protein G-coupled antibodies were used in following  
12 amounts: IRF8 - 10.0  $\mu$ g/reaction, PU.1 - 1:50 (v/v), LXR $\alpha/\beta$  - 3.0  $\mu$ g/reaction. Rabbit  
13 or goat IgG (Cell Signaling Technology or SantaCruz Biotechnology) were included in  
14 the amount corresponding 1/10 of respective immunoprecipitating antibodies.

15 Afterwards, the beads were washed with RIPA buffer (5 x), RIPA 500 buffer (Tris-HCl  
16 10,0 mmol/L pH 8.0, 1.0 mmol/L EDTA, 500 mmol/L NaCl, 1% (v/v) Triton X-100, 0.1%  
17 SDS (v/v), and 0.1% (w/v) Na-deoxycholate (w/v), 2 x), LiCl wash buffer (10.0 mmol/L  
18 Tris-HCl pH 8.0, 1.0 mmol/L EDTA, 250 mmol/L LiCl, 0.5% (v/v) NP-40, 0.5% (v/v) Na-  
19 deoxycholate (w/v), 2 x), and TE buffer (10.0 mmol/L Tris-HCl pH 8.0, 1.0 mmol/L  
20 EDTA pH 8.0, 1 x) and finally resuspended in 50  $\mu$ L of elution buffer containing 10  
21 mmol/L Tris-HCl pH 8, 5 mmol/L EDTA, 300 mmol/L NaCl and 0.5% SDS (v/v). Next,  
22 2  $\mu$ L of RNase (DNA-free, Roche) was added to each sample for 30 min at 37 °C  
23 followed by proteinase K (1.0 U/reaction, ThermoFisher Scientific) and glycogen (20  
24 mg/reaction, Roche) were added to samples for further 2 h at 37°C. The incubation  
25 was continued overnight at 65°C to elute the DNA and reverse the cross-link. DNA was  
26 purified from supernatants using SPRI magnetic beads (Applied Biological Material,

1 Richmond, Canada) added in a 2.3 x ratio (v/v) for 2 min. The beads were washed  
2 twice with ethanol (70% (v/v)) and DNA was eluted with water and analyzed in real  
3 time PCR. Calculated results are normalized to input sample of each probe.

4 *In silico gene expression profiling* - For the *in silico* gene expression profiling the  
5 ImmGen consortium [22] data and browsers were used, which were developed as an  
6 open resource supported by the National Institute of Allergy and Infectious Diseases  
7 (Bethesda, MD, [www.immgen.org](http://www.immgen.org)). ImmGen Gene Skyline tool allows extracting the  
8 expression profiles of a selected gene in a group of cell types, basing on fully validated  
9 microarray datasets. We here searched for *Lyz2* (lysozyme) or *Emr1* (F4/80) gene  
10 expression in "Key populations" data group, or in "Stem and progenitor cells" and  
11 "Macrophages (MFs), Neutrophils" for specific subset evaluation. Display settings  
12 provide a bar graph with linear scale of expression on x-axis and various cell  
13 populations on y-axis.

14 *Western Blotting* - Peritoneal macrophages were collected, centrifuged, and lysed on  
15 ice in RIPA buffer supplemented with protease inhibitor (Complete PIC, Roche).  
16 Protein concentration was estimated for each cell lysate using BCA protein assay  
17 (ThermoFisher Scientific). Following protein concentration determination, 40 µg/lane  
18 of the prepared protein samples were separated by SDS-polyacrylamide gel  
19 electrophoresis. Thereafter, proteins were transferred onto a PVDF membrane  
20 (BioRad Laboratories, München, Germany) which was then blocked for 1 hour with 5%  
21 non-fat dry milk in Tris-buffered saline containing 0,1% Tween-20 (TBS-T) prior to  
22 incubations with antibodies. Primary antibodies against S1P1/EDG-1 (Novus  
23 Biologicals, Littleton, CO), phospho and total p70S6-Kinase (Cell Signaling  
24 Technologies), phospho and total 4E-BP1 (Cell Signaling Technologies) were used to  
25 incubate the blots. Anti-β-actin-peroxidase antibodies (Sigma and Cell Signaling  
26 Technologies) were used to visualize actin as a control protein. Antibody binding

1 visualization was obtained by enhanced chemiluminescence (Western Lightning ECL  
2 Pro, Perkin Elmer, Rodgau, Germany), according to the manufacturer's instructions.

3 Differential leukocyte immunophenotyping – Blood and peritoneal leukocytes were  
4 immunophenotyped by flow cytometry as described previously [16,17]. Fluorescently  
5 labeled monoclonal antibodies against surface markers on macrophages (F4/80,  
6 MHCII, CD86, CD93, CD206, CD115, Dectin-1, MerTK, AXL-1, CD244, CD226) were  
7 purchased from ThermoFisher Scientific or BioLegend (Fell, Germany, see Table S2).  
8 For each FACS staining  $2 \times 10^5$  cells were incubated with antibody dilutions (0.25  $\mu\text{g}$   
9 for each antibody) in PBS with FBS (1.0 % v/v) for 30 minutes at 4°C. Cells were fixed  
10 for additional 30 minutes with formaldehyde (0.5% v/v). Afterwards, cells were  
11 centrifuged for 10 minutes, washed one time in PBS and analyzed on a CyFlow Space  
12 flow cytometer (Sysmex Partec, Münster, Germany). For the surface S1P<sub>1</sub> detection  
13 leukocytes were stained with antibody against EDG1 (1:50, Biorbyt, Cambridge, UK)  
14 for 30 minutes at 4°C. After washing, cells were incubated for additional 30 minutes  
15 with a secondary antibody (donkey anti-rabbit Alexa Fluor 647, 1:60) and anti-F4/80-  
16 PE to identify macrophages. Afterwards, cells were analyzed by flow cytometry. For  
17 intracellular staining, peritoneal macrophages were processed using Fix&Perm Cell  
18 Permeabilization Kit (ThermoFisher Scientific) following the recommendations of the  
19 manufacturer. Briefly, cells were stained with antibodies with F4/80-APC as described  
20 above and incubated in the Fixation Medium (Medium A) for 30 min at room  
21 temperature. Thereafter, cells were washed with PBS (1x) and the Permeabilization  
22 Medium (Medium B, 2x), resuspended in 50  $\mu\text{l}$  of Medium B, which included antibody  
23 against IRF8 (PE-conjugated, 0.25  $\mu\text{g}/\text{test}$ , ThermoFisher Scientific) and PU1 (Alexa  
24 Fluor488-conjugated, 0.25  $\mu\text{g}/\text{test}$ , Biolegend). The labelling was carried out at room  
25 temperature in the dark for 30 minutes. Subsequently, the cells were washed,

1 centrifuged, resuspended in PBS supplemented with FBS (1,0% v/v) and analyzed by  
2 flow cytometry as described above.

3 Flow cytometry assessment of kinase activities - Peritoneal leukocytes were isolated  
4 as described above and seeded in a 24-well plate at a density of  $4,0 \times 10^5$  cells/mL.  
5 After removal of non-adherent cells macrophages were incubated for 0, 60 or 120  
6 minutes in DMEM containing or not S1P (1.0  $\mu\text{mol/L}$ ). Subsequently, cells were fixed  
7 with pre-warmed BD Phosflow™ Lyse/Fix Buffer I (BD Biosciences, Heidelberg,  
8 Germany) for 15 minutes at 37°C. Cells were detached using cell scraper, washed,  
9 and permeabilized for 30 minutes at room temperature with BD Phosflow™  
10 Perm/Wash Buffer I (BD Biosciences). Afterwards, cells were stained with anti-F4/80  
11 (APC- or FITC-conjugated, 5.0  $\mu\text{g/mL}$ ), anti-phospho-STAT6 (Tyro 641, PE-  
12 conjugated, 0.25  $\mu\text{g/mL}$ ), anti-phospho-STAT3 (Tyro 705, Alexa Fluor488 -conjugated,  
13 0.25  $\mu\text{g/mL}$ , all from BioLegend) or anti-phospho-AKT (PE-conjugated, 0.25  $\mu\text{g/mL}$ ,  
14 Miltenyi Biotec, Bergisch Gladbach, Germany) for 30 minutes at room temperature.  
15 After washing macrophages were re-suspended in BD Phosflow™ Perm/Wash Buffer  
16 I and analyzed using CyFlow Space flow cytometer (Sysmex Partec).

17 Flow cytometry assessment of apoptosis and efferocytosis – Annexin binding was  
18 used as an indicator of macrophage apoptosis. Peritoneal macrophages isolated as  
19 described above and seeded in a 24-well plate at a density of  $2.5 \times 10^5$  cells/mL were  
20 incubated in DMEM supplemented with FBS (10.0 % v/v) and exposed for 24 h to  
21 thapsigargin (0.5  $\mu\text{mol/L}$ ) and fucoidan (25  $\mu\text{g/mL}$ ) or AcLDL (100  $\mu\text{g/mL}$ ) and ACAT  
22 inhibitor Sandoz 58-035 (10.0  $\mu\text{g/mL}$ ). For determination of the annexin V binding,  
23 macrophages were detached from plate by scraping and resuspended in a buffer  
24 containing NaCl (140 mmol/L), HEPES (10 mmol/L) and  $\text{CaCl}_2$  (2.5 mmol/L). Annexin  
25 V-FITC (Bender Med-Systems Diagnostics, Vienna, Austria) was added for 30 min at  
26 room temperature according to the supplier instructions. Flow cytometric

1 measurements of annexin V binding were performed on a CyFlow Space flow  
2 cytometer (Sysmex Partec). Necrotic cells were detected by counterstaining with  
3 propidium iodide (PI). For the assessment of efferocytosis, RAW 264.7 murine  
4 macrophages were seeded onto 6 well plate at the density  $1 \times 10^6$  cells/well. Adherent  
5 cells were labelled with calcein-AM ( $1.0 \mu\text{mol/L}$ , BioLegend) for 30 min and washed  
6 twice with PBS to remove dye excess. Apoptotic cells were generated by incubating  
7 RAW 264.7 cells with staurosporine ( $10.0 \mu\text{mol/L}$ ) in serum-free DMEM for 16 - 18  
8 hours. Under these conditions the efficiency of apoptosis exceeded 90 % as tested by  
9 Annexin-V staining. Apoptotic cells were collected by scraping, washed in PBS, and  
10 resuspended in serum-free DMEM ( $1 \times 10^6$  cells/mL). Peritoneal macrophages were  
11 isolated as described above, seeded on 12-well plate at density of  $0.5 \times 10^6$  cells/well,  
12 and starved overnight in DMEM containing 0.1% (v/v) FBS. Afterwards, cells were  
13 washed with PBS and overlaid with apoptotic RAW 264.7 cells at ratio 1:1 (cell/cell).  
14 After incubation for 30 min. at  $37^\circ\text{C}$  the medium was removed, peritoneal macrophages  
15 rinsed twice with ice cold PBS and collected by scraping. The labelling with the APC-  
16 conjugated antibody against F4/80 was performed as described above. The fraction of  
17 F4/80<sup>+</sup> efferocytotic (calcein-positive) cells was assessed by flow cytometry (CyFlow  
18 Space).

19 Fluorimetric assays for caspases 3 and 12 - Peritoneal macrophages exposed to  
20 thapsigargin or AcLDL as described above were resuspended in a hypotonic cell lysis  
21 buffer, subjected to three freeze/thaw cycles, and centrifuged. Caspase activities were  
22 measured in the supernatant according to the manufacturer protocols using Ac-DEVD-  
23 AFC, LEHD-AFC and ATAD-AFC ( $380(\text{ex})/500(\text{em}) \text{ nm}$ ), as substrates for caspases  
24 3, 9 and 12, respectively (all from BioVision, Milpitas, CA). Fluorescence was  
25 determined using a LS70 spectral fluorimeter (PerkinElmer, Rodgau, Germany). Data

1 were expressed as relative fluorescence units (RFU) adjusted for the sample protein  
2 content.

3 Cytokine determination – Cytokine (IL-10, IL-4, IL-1RA, IL-5, IL-6, TNF- $\alpha$ ,  
4 CXCL1/GRO- $\alpha$ ) and chemokine (CCL22, CCL5/RANTES) levels were quantified in  
5 mouse plasma and supernatants of peritoneal macrophages or neutrophils either by  
6 commercially available ELISA (Bio-Techne, see Table S3) or multiplex  
7 electrochemiluminescence immunoassay using the V-PLEX Proinflammatory Panel 1  
8 Mouse Kit (MesoScale Discovery, Rockville, MD) according to the manufacturer's  
9 instructions.

10 Determination of the cellular cyclic AMP (cAMP) concentration - Quantification of  
11 intracellular cAMP was performed using a DetectX Cyclic AMP Direct EIA Kit (Arbor  
12 Assays, Ann Arbor, MI), according to the manufacturer instructions. Briefly, peritoneal  
13 macrophages were isolated as described above, seeded in a 48-well plate ( $4.5 \times 10^6$   
14 cells/mL) and incubated with 3-isobutyl-1 methyl xanthine (IBMX, Sigma, 0.2 mmol/L)  
15 for 30 minutes. After treatment, cells were exposed S1P (1.0  $\mu$ mol/L) for additional 30  
16 minutes. Cell media were aspirated, and cells were washed with ice-cold PBS.  
17 Adherent cells were treated directly with the sample diluent provided by the  
18 manufacturer for 10 minutes at room temperature. Cell lysates were precleared by  
19 centrifugation (600 x g, 4°C, 15 minutes) and used for EIA as suggested by the  
20 manufacturer. The optical density was determined spectrophotometrically at 450nm  
21 (FluoSTAR Optima, BMG Labtech, Ortenburg, Germany). Samples were analyzed in  
22 duplicate to ensure consistency of reading.

23 Determination of protein kinase A (PKA) activity – The PKA activity was determined  
24 using the PepTag Assay (Promega, Mannheim, Germany) according to the protocol  
25 provided by the manufacturer. Briefly, peritoneal macrophages were isolated as  
26 described above, seeded on 24-well plate at density of  $1 \times 10^6$  cells/mL and incubated

1 with or without S1P (1.0  $\mu\text{mol/L}$ ) for 2 h. The cells were washed and suspended in PKA  
2 extraction buffer containing Tris-HCl (25.0 mmol/L, pH 7.4), EDTA (0.5 mmol/L), EGTA  
3 (0.5 mmol/L),  $\beta$ -mercaptoethanol (10.0 mmol/L), leupeptin and aprotinin (each 1.0  
4  $\mu\text{g/mL}$ ). After homogenization the lysates were precleared by centrifugation (14000 x  
5 g, 5 min, 4°C) and incubated with PKA assay buffer, PKA activator (cAMP, 1.0  $\mu\text{mol/L}$ )  
6 and PKA substrate (PepTag® Peptide A, 2.0  $\mu\text{g}$ ) for 2h at room temperature. The  
7 reaction was stopped by heating the probes (10 minutes, 95°C). Two forms of PKA  
8 substrate (phosphorylated and non-phosphorylated) were separated on agarose gel  
9 (0,8% (v/v) in 50.0 mmol/L Tris-HCl, pH 8,0) and visualized under UV light. The  
10 phosphorylated peptide form was excised from the gel, solubilized using the acidified  
11 gel solubilization solution provided by the manufacturer, and its amount was quantified  
12 by measuring the absorbance at 570 nm. The negative control containing the PepTag®  
13 Peptide A but no kinase was used to determine the exact molar absorptivity of the dye.  
14 Cell cholesterol efflux assay - Peritoneal macrophages were seeded in 48-well plates  
15 at a density of  $3,5 \times 10^5$  cells/mL and incubated for 24 h in DMEM containing FBS (10.0  
16 % v/v) and 2 mmol/L glutamine. Cells were labeled with 2.0  $\mu\text{Ci/mL}$  [1,2- $^3\text{H}$ ]-cholesterol  
17 (Perkin Elmer) in DMEM containing FBS (1.0 % v/v) for 24 hours. Subsequently, cells  
18 were treated for 18 hours with 22-(R) hydroxycholesterol (22-OH, 5  $\mu\text{g/mL}$ ) and 9-cis  
19 retinoic acid (9cRA, 10  $\mu\text{mol/L}$ ) or desmosterol (50  $\mu\text{g/mL}$ , Biomol, Hamburg,  
20 Germany) in DMEM containing bovine serum albumin (BSA, 2.0 % v/v) and the ACAT  
21 inhibitor Sandoz 58-035 (2.0  $\mu\text{g/mL}$ ) to prevent cellular accumulation of cholesteryl  
22 ester. Cholesterol efflux was induced by adding apoA-I (10.0  $\mu\text{g/mL}$ ) or HDL (12.5  
23  $\mu\text{g/mL}$ ) for 4 hours. Afterwards, 100  $\mu\text{L}$  of efflux medium was added to scintillation vials  
24 containing 4 mL of scintillation cocktail (Ultima Gold, Perkin Elmer) and counted for the  
25 radioactivity using beta scintillation spectrometer. Total cholesterol was extracted from  
26 macrophages with 0.6 ml of 2-propanol. Lipid extracts were dried under  $\text{N}_2$ ,

1 resuspended in 1 ml of toluene, and their [<sup>3</sup>H]-cholesterol content was quantified by  
2 liquid scintillation counting. Cholesterol efflux was expressed as a percentage of the  
3 radioactivity released into the medium over the total radioactivity incorporated by cells  
4 as described previously [23].

5 Functional characterization of neutrophils - Neutrophils isolated by negative magnetic  
6 sorting were counted and seeded in 12-well-plates at a density of  $0,4 \times 10^5$  cells/well.  
7 To avoid adherence, Teflon<sup>TM</sup> sheets were used. Subsequently, cells were stimulated  
8 either with lipopolysaccharide (LPS, Sigma, 1.0 µg/mL, 4h), or phorbol-12-myristat-13-  
9 acetat (PMA, Sigma, 1.0 µmol/L, 2h). For PMA-stimulated cells dihydrorodamine 123  
10 – a reactive oxygen species (ROS) indicator (DHR, Biomol, 15.0 µmol/L) was added  
11 for the last 30 min of incubation. Afterwards, media were collected for cytokine  
12 determination and cells were labelled with antibodies against CD62-L (L-selectin  
13 shedding indicator), Ly6G, Ly6C and CD11b for flow cytometry.

14 Statistical procedures - Data are presented as means ± S.D. from at least three  
15 independent determinations. The distribution normality was assessed either with  
16 Smirnov-Kolmogorov or Shapiro-Wilk tests. Comparisons between two groups were  
17 performed with Student t test or Mann-Whitney U test for normally and non-normally  
18 distributed populations, respectively. Comparisons between three or more groups were  
19 performed with one- or two-way ANOVA with Holm-Sidak test for pairwise *post-hoc*  
20 comparisons or Kruskal-Wallis h test with Conover test for pairwise *post-hoc*  
21 comparisons for normally and non-normally distributed populations, respectively. p  
22 values <0.05 were considered significant.



## REFERENCES

- 1  
2 1. Clausen BE, et al. Conditional gene targeting in macrophages and granulocytes  
3 using LysMcre mice. *Transgenic Res* 1999;8:265-277
- 4 2. Schaller E, et al. Inactivation of the F4/80 glycoprotein in the mouse germ line. *Mol*  
5 *Cell Biol.* 2002;22:8035-8043.
- 6 3. Ishibashi S, et al. Hypercholesterolemia in low density lipoprotein receptor knockout  
7 mice and its reversal by adenovirus-mediated gene delivery. *J Clin Invest* 1993.  
8 92:883-893
- 9 4. Effect of apolipoprotein M on high density lipoprotein metabolism and  
10 atherosclerosis in low density lipoprotein receptor knock-out mice. *J. Biol. Chem.*  
11 2008;283,1839-1847
- 12 5. Fraenkel-Conrat, H. Methods for investigating the essential groups for enzyme  
13 activity. *Methods Enzymol.* 1957;4:247-269
- 14 6. Burkhardt R, et al. Trib1 is a lipid- and myocardial infarction-associated gene that  
15 regulates hepatic lipogenesis and VLDL production in mice. *J Clin Invest.*  
16 2010;120:4410-4414
- 17 7. Scherer M, et al. High-throughput analysis of sphingosine 1-phosphate, sphinganine  
18 1-phosphate, and lysophosphatidic acid in plasma samples by liquid  
19 chromatography-tandem mass spectrometry. *Clin Chem.* 2009;55:1218-1222.
- 20 8. Daugherty A, Tall AR, Daemen MJAP, Falk E, Fisher EA, García-Cardena G, Lusis  
21 AJ, Owens AP 3rd, Rosenfeld ME, Virmani R; American Heart Association Council  
22 on Arteriosclerosis, Thrombosis and Vascular Biology; and Council on Basic  
23 Cardiovascular Sciences. Recommendation on design, execution, and reporting of  
24 animal atherosclerosis studies: a scientific statement from the American Heart  
25 Association. *Circ Res.* 2017;121:e53-e79

- 1 9. Burkhardt R, et al. Cosegregation of aortic root atherosclerosis and intermediate  
2 lipid phenotypes on chromosomes 2 and 8 in an intercross of C57BL/6 and  
3 BALBc/ByJ low-density lipoprotein receptor<sup>-/-</sup> mice. *Arterioscler Thromb Vasc Biol.*  
4 2011;31:775-784
- 5 10. Schindelin J, et al. Fiji: an open-source platform for biological-image analysis. *Nat*  
6 *Methods* 2012;9:676-682
- 7 11. Yancey PG, et al. Macrophage LRP-1 controls plaque cellularity by regulating  
8 efferocytosis and Akt activation. *Arterioscler Thromb Vasc Biol.* 2010;30:787-795.
- 9 12. Schrijvers DM, et al. Phagocytosis of apoptotic cells by macrophages is impaired  
10 in atherosclerosis. *Arterioscler Thromb Vasc Biol.* 2005;25:1256–1261.
- 11 13. Thorp E, et al. MERTK receptor mutation reduces efferocytosis efficiency and  
12 promotes apoptotic cell accumulation and plaque necrosis in atherosclerotic lesions  
13 of apoE<sup>-/-</sup> mice. *Arterioscler Thromb Vasc Biol.* 2008;28:1421–1428.
- 14 14. Yam LT et al. Cytochemical identification of monocytes and granulocytes. *Am J Clin*  
15 *Pathol* 1971;55:283-290
- 16 15. Vorbach S, et al. F. Enhanced expression of the sphingosine-1-phosphate-  
17 receptor-3 causes acute myelogenous leukemia in mice. *Leukemia.* 2020  
18 Mar;34(3):721-734
- 19 16. Potì F, et al. KRP-203, sphingosine 1-phosphate receptor type 1 agonist,  
20 ameliorates atherosclerosis in LDL-R<sup>-/-</sup> mice. *Arterioscler Thromb Vasc Biol.*  
21 2013;33:1505–1512.
- 22 17. Nofer JR, et al. FTY720, a synthetic sphingosine 1 phosphate analogue, inhibits  
23 development of atherosclerosis in low-density lipoprotein receptor-deficient mice.  
24 *Circulation.* 2007;115:501–508
- 25 18. Kallio MA, et al. Chipster: user-friendly analysis software for microarray and other  
26 high-throughput data. *BMC Genomics.* 2011;12:507

- 1 19. Smyth GK. Linear models and empirical bayes methods for assessing differential  
2 expression in microarray experiments. *Stat Appl Genet Mol Biol*. 2004;3:Article 3.
- 3 20. Zhou Y, et al. Metascape provides a biologist-oriented resource for the analysis  
4 of systems-level datasets. *Nat Commun*. 2019;10:1523.
- 5 21. Blecher-Gonen R, et al. High-throughput chromatin immunoprecipitation for  
6 genome-wide mapping of in vivo protein-DNA interactions and epigenomic states.  
7 *Nat Protoc*. 2013;8:539-554
- 8 22. Heng TS, Painter MW; Immunological Genome Project Consortium. The  
9 Immunological Genome Project: networks of gene expression in immune cells. *Nat*  
10 *Immunol*. 2008;9:1091-1094.
- 11 23. Zanotti I, et al. The LXR agonist T0901317 promotes the reverse cholesterol  
12 transport from macrophages by increasing plasma efflux potential. *J Lipid Res*.  
13 2008;49:954-960
- 14 24. Rébé C, et al. Identification of biological markers of liver X receptor (LXR)  
15 activation at the cell surface of human monocytes. *PLoS One*. 2012;7(11):e48738

## SUPPLEMENTAL FIGURES

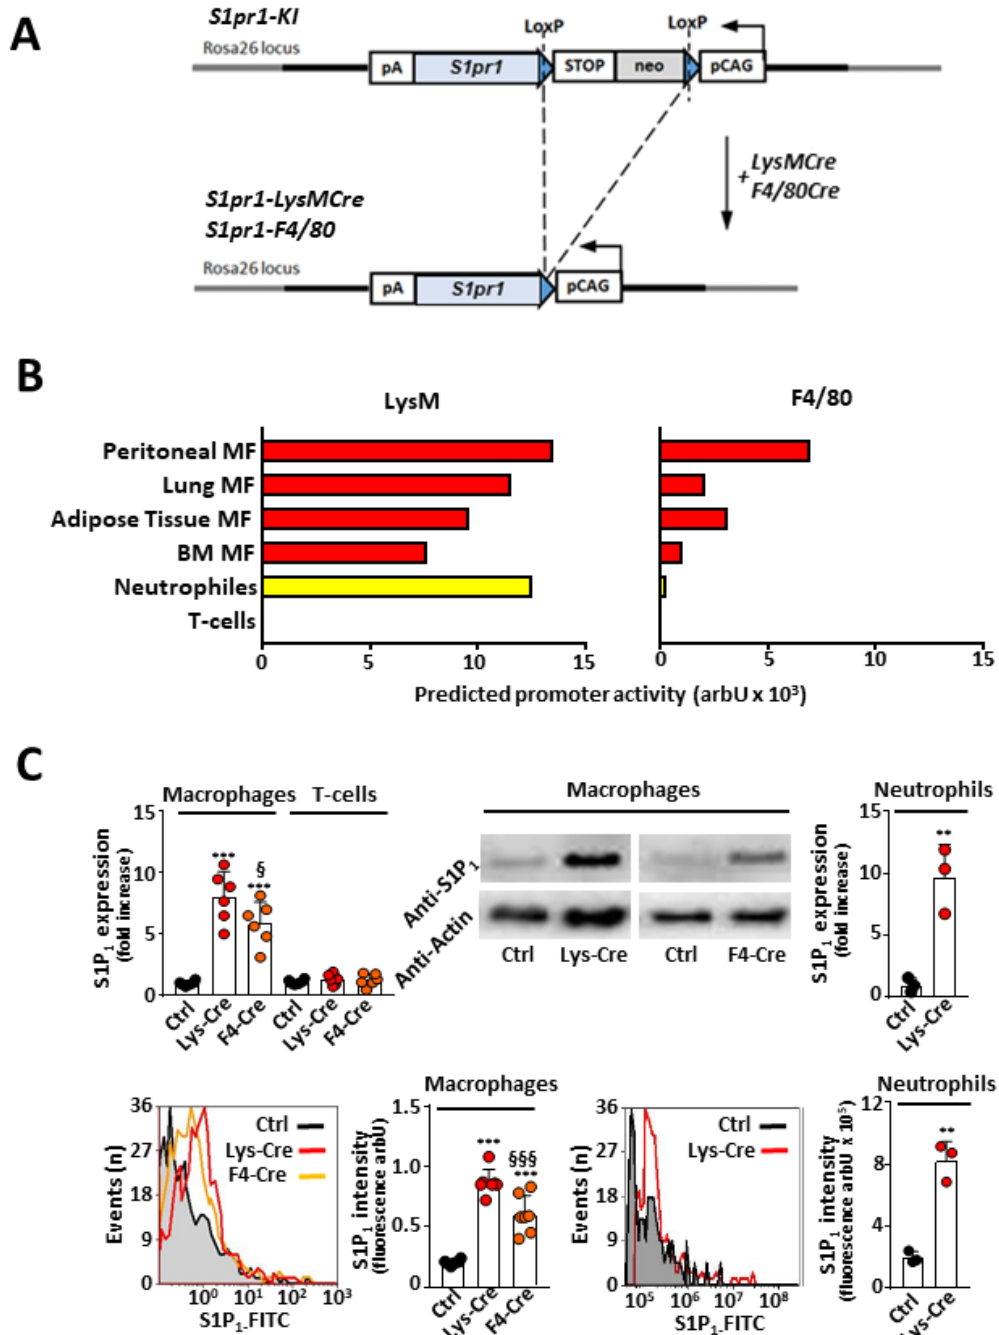

**Supplemental Figure 1. Generation of *S1pr1-LysMCre* or *S1pr1-F4/80Cre* mice and characterization of *S1P<sub>1</sub>* overexpressing macrophages and neutrophils - A.** Schematic representation of the targeting vector prior to (top) and following (bottom) Cre recombination. The excision of a floxed blocking element activates pCAG promoter and *S1P<sub>1</sub>* expression. **B.** Predicted LysM and F4/80 promoter activities in myeloid cells as determined with ImmGen Skyline tool. **C.** Peritoneal MF or splenocytes were collected from *S1pr1-KI* (Ctrl), *S1pr1-LysMCre* (Lys-Cre) or *S1pr1-F4/80Cre* (F4-Cre) fed Chow diet. Neutrophils were isolated from bone marrows by magnetic sorting. *S1p1* expression was analyzed by qPCR. mRNA levels were normalized to *Gapdh* and presented relative to *S1p1-KI*. Protein extracts were subjected to Western Blotting with an anti-*S1P<sub>1</sub>* or anti-beta-actin antibody. Cell surface staining for *S1P<sub>1</sub>* was analyzed by flow cytometry. Shown are representative histograms superimposed for comparison and bar graphs representing fluorescent medians. Data represent means  $\pm$  SD from 3 to 6 determinations. Blots are representative for one experiment out of two. \* -  $p < 0.05$ , \*\* -  $p < 0.01$ , \*\*\* -  $p < 0.001$  (Lys-Cre vs. Ctrl or F4-Cre vs. Ctrl, ANOVA except **C** *S1P* intensity/Neutrophils: Kruskal-Wallis h-test). MF – macrophages.

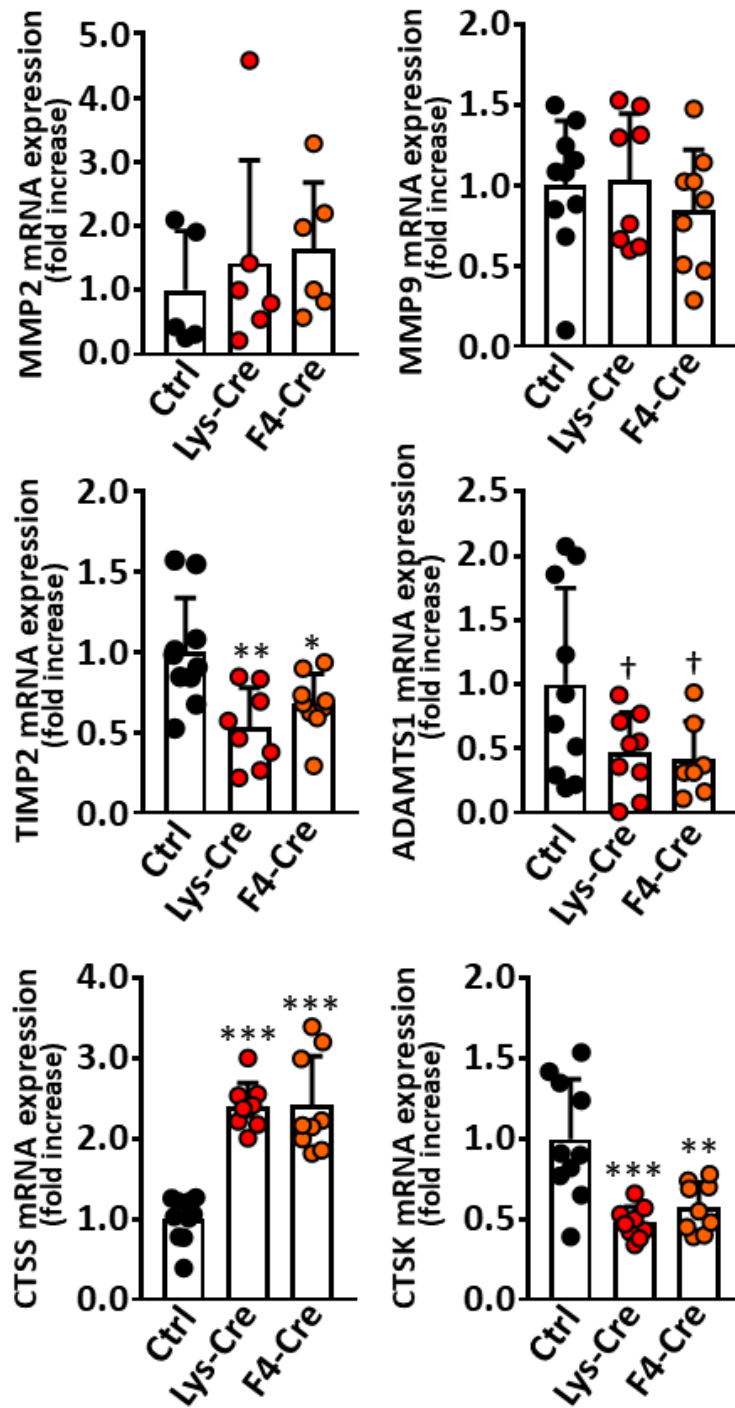

**Supplemental Figure 2. Effect of  $S1P_1$  overexpression in macrophages on the expression of collagen-degrading proteinases** – Peritoneal macrophages were collected from *Ldlr*<sup>-/-</sup> mice transplanted with *S1pr1-KI* (n=6-10), *S1pr1-LysMCre* (n=6-9) or *S1pr1-F4/80Cre* (n=6-9) BM and fed Western diet (WD). The expressions of matrix metalloproteinases (*Mmp*) 2 and 9, a disintegrin and metalloproteinase with a thrombospondin type 1 motif (*Adamts*) member 1, tissue inhibitor of metalloproteinase (*Tim*) 2 and cathepsins (*Cts*) S and K were analyzed by qPCR. mRNA levels were normalized to *Gapdh* and presented relative to *S1pr1-KI*. † - p<0.1, \* - p<0.05, \*\* - p<0.01, \*\*\* - p<0.001 (Lys-Cre vs. Ctrl or F4-Cre vs. Ctrl, ANOVA except *Mmp2*mRNA expression: Kruskal-Wallis h-test).

**A**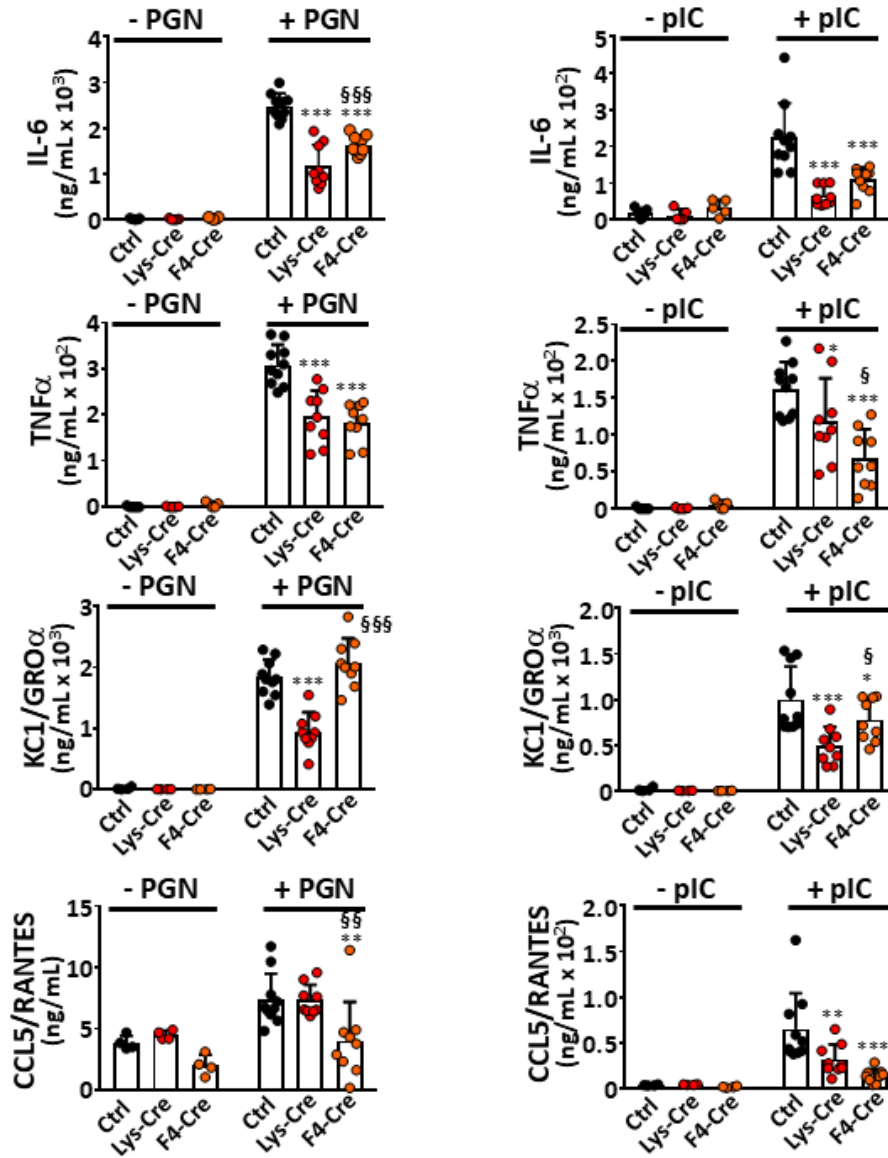**B**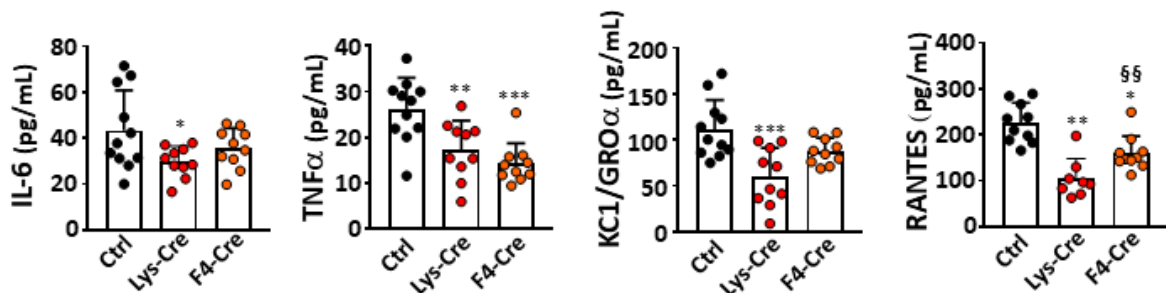

**Supplemental Figure 3. Effect of  $S1P_1$  overexpression in macrophages on pro-inflammatory cyto- and chemokine production** – **A**. Peritoneal macrophages from either  $S1pr1$ -KI (Ctrl, n=4-10),  $S1pr1$ -LysMCre (Lys-Cre, n=4-9) or  $S1pr1$ -F4/80Cre (F4-Cre, n=4-9) mice on normal diet were incubated for 24 h in media containing agonists of TLR2 (peptidoglycan, PGN, 0.02  $\mu$ g/mL) or TLR3 (polyinosinic-polycytidylic acid, pIC, 0.05  $\mu$ g/mL). Cyto- and chemokines in medias were determined by ELISA. **B**. Cyto- or chemokines in plasmas from LDL-R<sup>-/-</sup> mice on WD transplanted with  $S1pr1$ -KI (n=10-11),  $S1pr1$ -LysMCre (n=8-10) or  $S1pr1$ -F4/80Cre (n=10) BM were determined by V-PLEX Proinflammatory Panel 1 Mouse Kit (MesoScale). \* - p<0.05, \*\* - p<0.01, \*\*\* - p<0.001 (Lys-Cre vs. Ctrl or F4-Cre vs. Ctrl) § - p<0.05, §§ - p<0.01, §§§ - p<0.001 (Lys-Cre vs. F4-Cre, ANOVA except **B** RANTES: Kruskal-Wallis h-test).

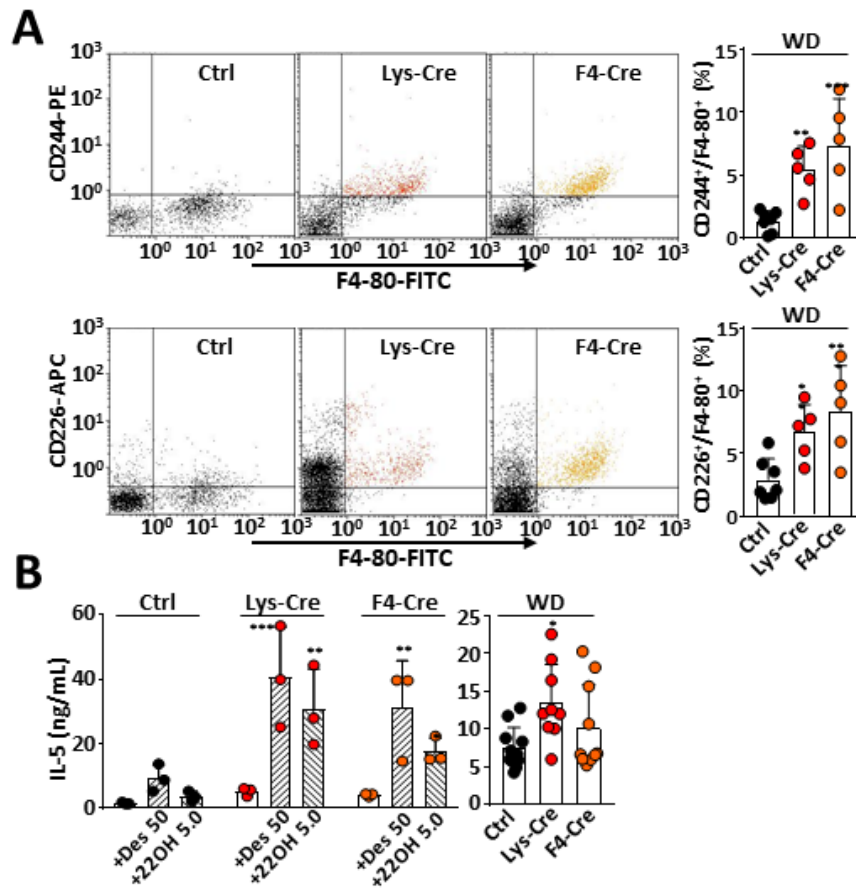

**Supplemental Figure 4. Additional phenotypic characterization of  $S1P_1$  overexpressing macrophages** - Peritoneal macrophages were collected from  $LDL-R^{-/-}$  mice transplanted with  $S1pr1-KI$  ( $n=11$ ),  $S1pr1-LysMCre$  ( $n=9$ ) or  $S1pr1-F4/80Cre$  ( $n=10$ ) BM and fed Western diet (WD). **A**. Cell surface staining for LXR activity markers CD244 and CD226 [24] was analyzed by flow cytometry. Shown are representative dot-plots and bar graphs representing percent of CD244<sup>+</sup>/F4/80<sup>+</sup> and CD226<sup>+</sup>/F4/80<sup>+</sup> macrophages ( $n=5-7$  pro group). **B**. Peritoneal macrophages ( $n=3$  pro group) established in cell culture were incubated for 24 h in media containing desmosterol (Des, 50  $\mu\text{mol/L}$ ) or 22-hydroxycholesterol and 9-cis-retinoic acid (22OH, 5.0  $\mu\text{mol/L}$ ). IL-5 concentrations in cell media and plasmas from WD-fed mice were determined by ELISA. \* -  $p < 0.05$ , \*\* -  $p < 0.01$ , \*\*\* -  $p < 0.001$  (Lys-Cre vs. Ctrl or F4-Cre vs. Ctrl, ANOVA except **B** IL-5/WD Kruskal-Wallis h-test).

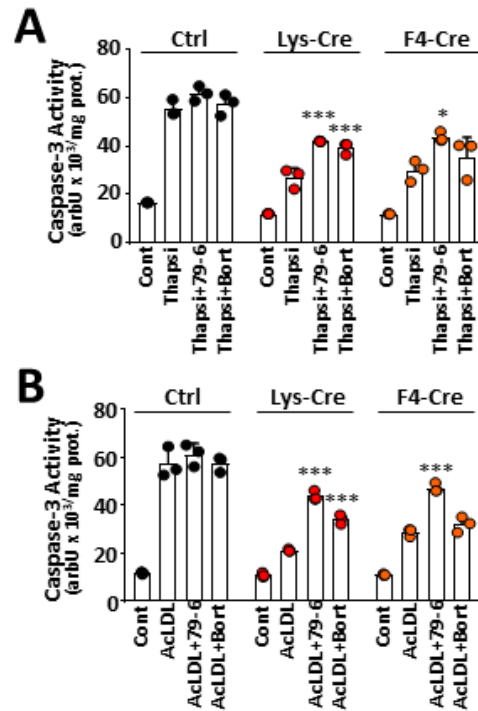

**Supplemental Figure 5. Effect of modulators of anti-apoptotic proteins on thapsigargin- or cholesterol-loading-induced caspase 3 activity** - Peritoneal macrophages from either *S1pr1-KI* (Ctrl, n=3), *S1pr1-LysMCre* (Lys-Cre, n=3) or *S1pr1-F4/80Cre* (nF4-Cre, n=3) mice on normal diet were established in cell culture and incubated for 30 min with 79-6 (Bcl6 inhibitor, 50.0  $\mu\text{mol/L}$ ), bortezomib (Maf inhibitor, 100 nmol/L) or vehiculum (Cont) prior to adding thapsigargin/fukoidan (Thapsi, 0.5  $\mu\text{mol/L}$  and fukoidan 25.0  $\mu\text{g/mL}$ , **A**) or acetylated LDL (AcLDL, 100.0  $\mu\text{g/mL}$ , **B**) for 24 h. Bar graphs show caspase-3 activities (lower panels). \* -  $p < 0.05$ , \*\* -  $p < 0.01$  (thapsigargin vs. thapsigargin + inhibitor or AcLDL vs. AcLDL + inhibitor, ANOVA).



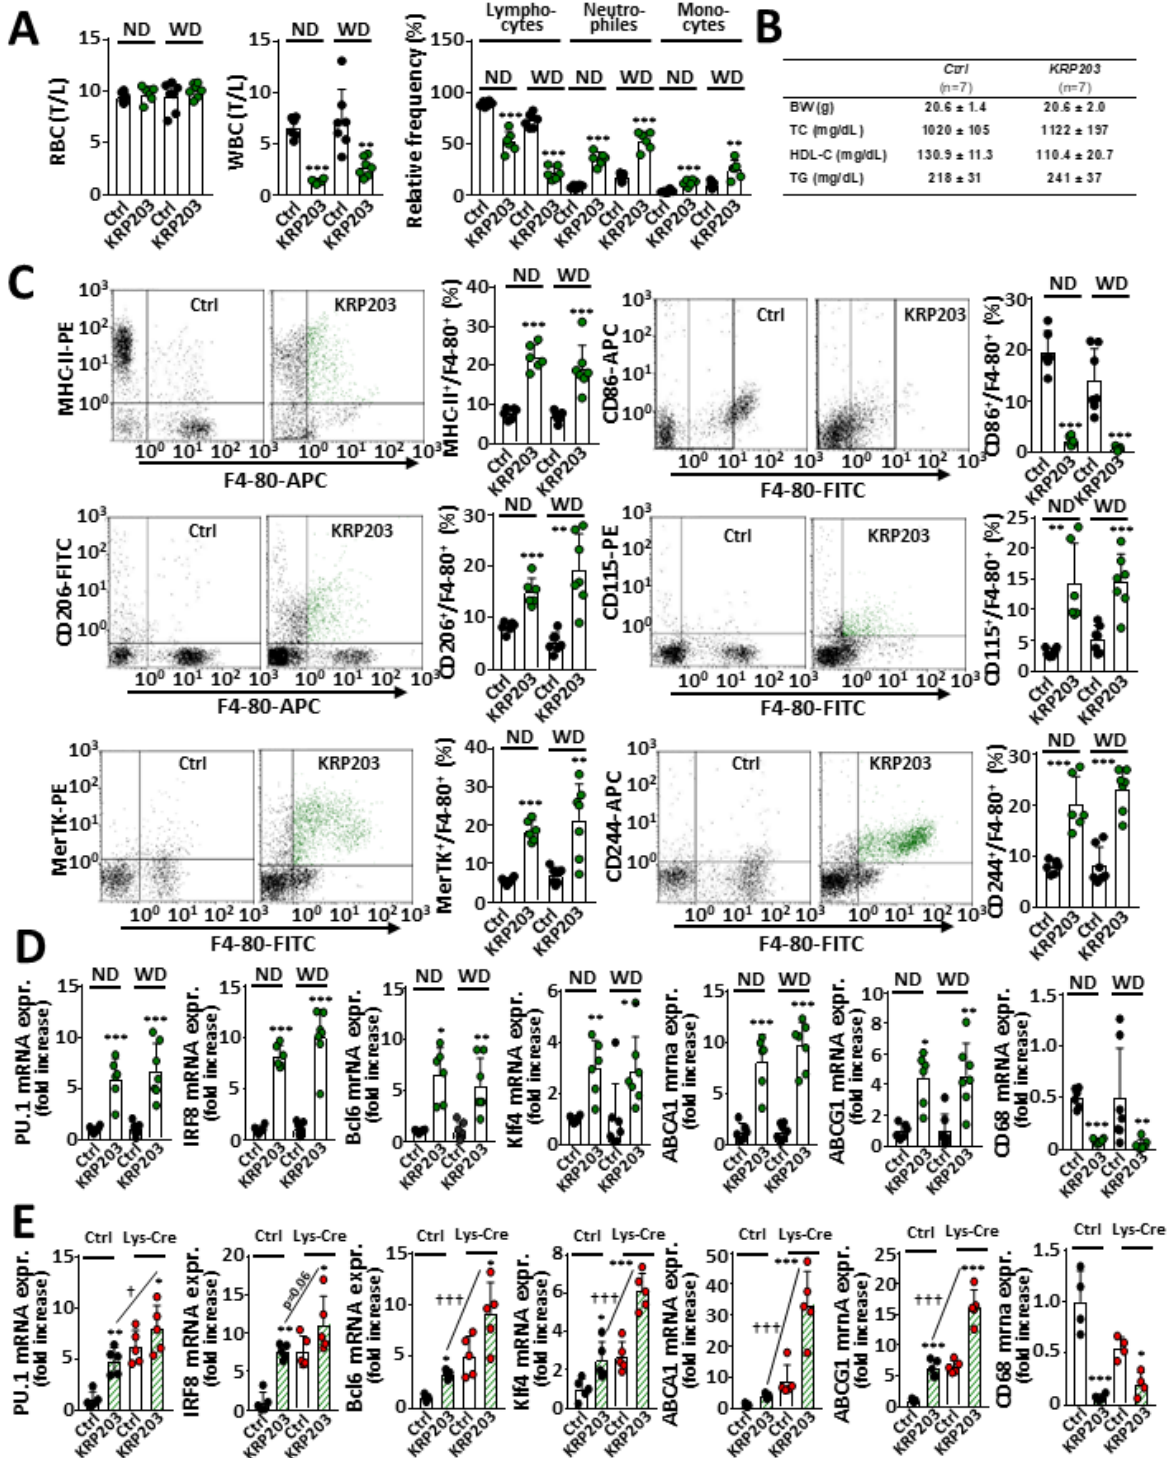

**Supplemental Figure 6. Effect of *S1P*<sub>1</sub> agonist KRP-203 on peripheral blood counts and macrophage phenotype in WT or *LDL-R*<sup>-/-</sup> mice** - ND-fed WT or *Ldlr*<sup>-/-</sup> mice fed WD for 4 weeks were administered KRP-203 (3.0 mg/kg, ND: n=6, WD: n=6) or saline (controls (Ctrl), ND: n=7, WD: n=7) for further 4 weeks, euthanized, and blood and PM were collected. **A.** Red and white blood cell counts (RBC, WBC) and differential leukocyte counts were determined on hematology analyzer. **B.** Body weights (BW), plasma total cholesterol (TC), HDL cholesterol (HDL-C) and triglycerides (TG) were determined in *Ldlr*<sup>-/-</sup> mice. **C** and **D.** PM were directly analyzed by flow cytometry or established in cell culture. (C) Cell surface stainings for MHC-II, CD115, CD206, CD86, MerTK and CD244. Bar graphs represent percent of cells positive for each marker and F4/80. (D) *Sp1* (PU.1), *Irf8*, *Bcl6*, *Klf4*, *Abca1*, *Abcg1* and *Cd68* expression analyzed by qPCR. mRNA levels were normalized to *Gapdh*. **E.** PM obtained from *S1p1-KI* mice (Ctrl, n=5 pro group) or *S1p1-LysMCre* mice overexpressing *S1P*<sub>1</sub> (Lys-Cre, n=5 pro group) were exposed for 24 h to KRP-203-phosphate (1.0 μmol/L). Gene expression was analyzed and presented as described above. \* - p<0.05, \*\* - p<0.01, \*\*\* - p<0.001 (KRP-203 vs. Ctrl), † - p<0.05, ††† - p<0.001 (Ctrl vs. Lys-Cre, Student t test except **C** CD115/ND, **C** CD244/WD, **D** *Klf4*/WD, **D** *Abcg1*/WD, **D** *Cd68*/WD: Mann-Whitney U test).

**A**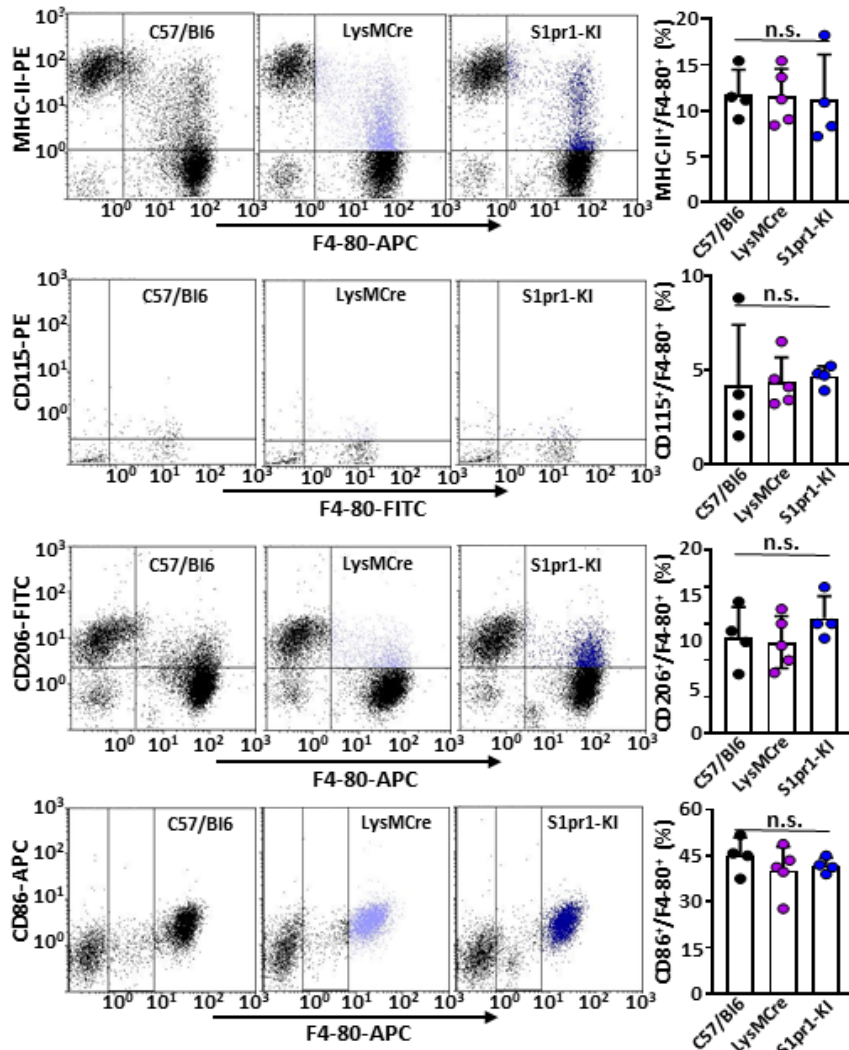**B**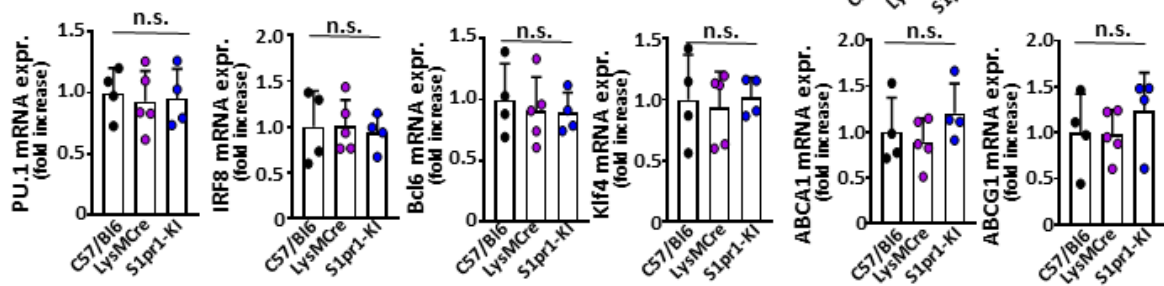

**Supplemental Figure 7. Effect of mouse line on PM phenotype** - ND-fed WT (C57/Bl6) mice (n=5), S1pr1-KI mice (n=4) and LysMCre mice (n=5) were euthanized, and peritoneal macrophages were collected, directly analyzed by flow cytometry, or established in cell culture. **A.** Cell surface stainings for MHC-II, CD115, CD206 and CD86. Bar graphs represent percent of cells positive for each marker and F4/80. **B.** *Sp1* (PU.1), *Irf8*, *Bcl6*, *Klf4*, *Abca1* and *Abcg1* expression analyzed by qPCR. mRNA levels were normalized to *Gapdh* and are presented relative to controls. n.s. – not significant (Kruskal-Wallis h-test).

**A**

|               | <i>S1pr1-KI/apoM<sup>-/-</sup></i><br>(n=9) | <i>S1pr1-LysMCre/apoM<sup>-/-</sup></i><br>(n=8) |
|---------------|---------------------------------------------|--------------------------------------------------|
| BW (g)        | 22.3 ± 2.0                                  | 21.5 ± 1.7                                       |
| TC (mg/dL)    | 826 ± 317                                   | 462 ± 124*                                       |
| HDL-C (mg/dL) | 86.0 ± 12.8                                 | 62.0 ± 12.5*                                     |
| TG (mg/dL)    | 275 ± 114                                   | 130 ± 35.4*                                      |
| S1P (μmol/L)  | 0.89 ± 0.19                                 | 1.24 ± 0.36                                      |

**B**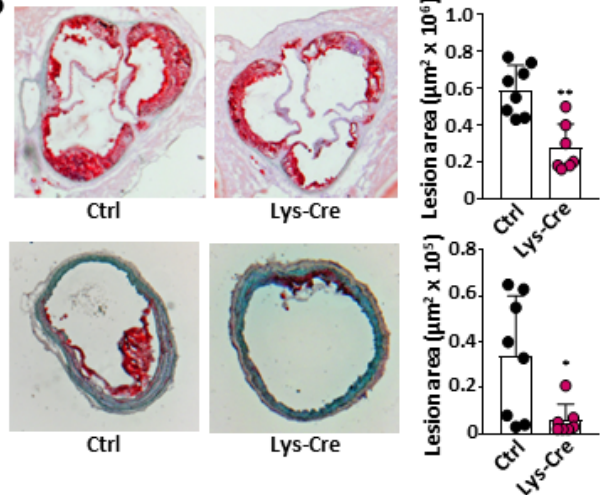**C**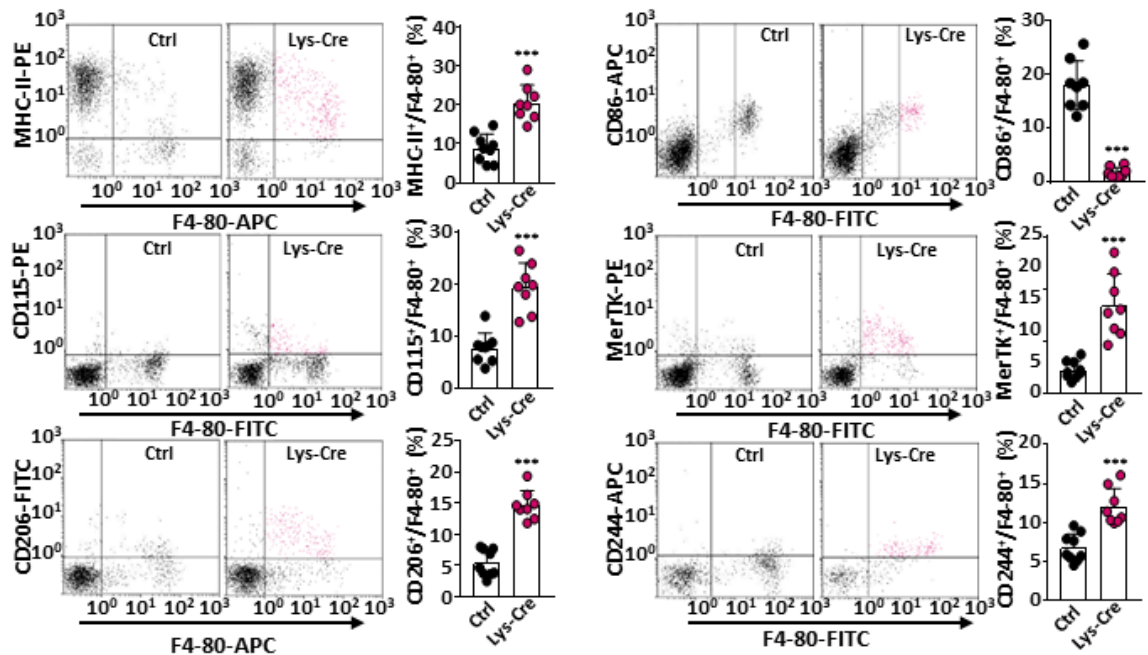**D**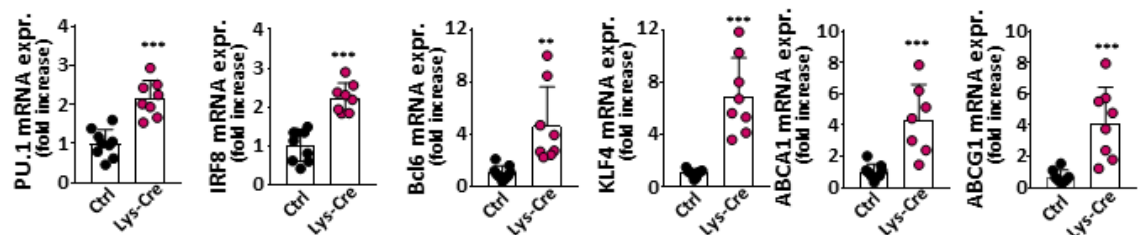

**Supplemental Figure 8.** – Effect of apoM deficiency on plasma lipids, atherosclerosis and macrophage phenotype in *LDL-R<sup>-/-</sup>* mice with hematopoietic *S1P<sub>1</sub>*-overexpression – *ApoM<sup>-/-</sup>/LDL-R<sup>-/-</sup>* mice were transplanted with bone marrow from *S1pr1-KI* (Ctrl, n=8-9) or *S1pr1-LysMCre* (Lys-Cre, n=7-8) mice and fed Western diet (WD) for 14 weeks. Animals were euthanized and aortas, brachiocephalic arteries, blood, and peritoneal macrophages were collected, **A**. Plasma lipids and S1P concentrations were determined as described under Methods **B**. Aortic roots and brachiocephalic arteries were used for morphometric analysis. Shown are representative Oil Red O stainings of lesions and quantification of lesion areas (bar graphs). **C**. and **D**. Peritoneal macrophages were directly analyzed by flow cytometry or established in cell culture. (C) Cell surface stainings for MHC-II, CD115, CD206, CD86, MerTK and CD244. Bar graphs represent percent of cells positive for each marker and F4/80. (D) *Sp1* (PU.1), *Irf8*, *Bcl6*, *Klf4*, *Abca1* and *Abcg1* expression analyzed by qPCR. mRNA levels were normalized to *Gapdh* and are presented relative to controls. \* -  $p < 0.05$ , \*\* -  $p < 0.01$ , \*\*\* -  $p < 0.001$  (Lys-Cre vs. Ctrl, Student t test except **B** upper panel, **D** *Bcl6* mRNA: Mann-Whitney U test).

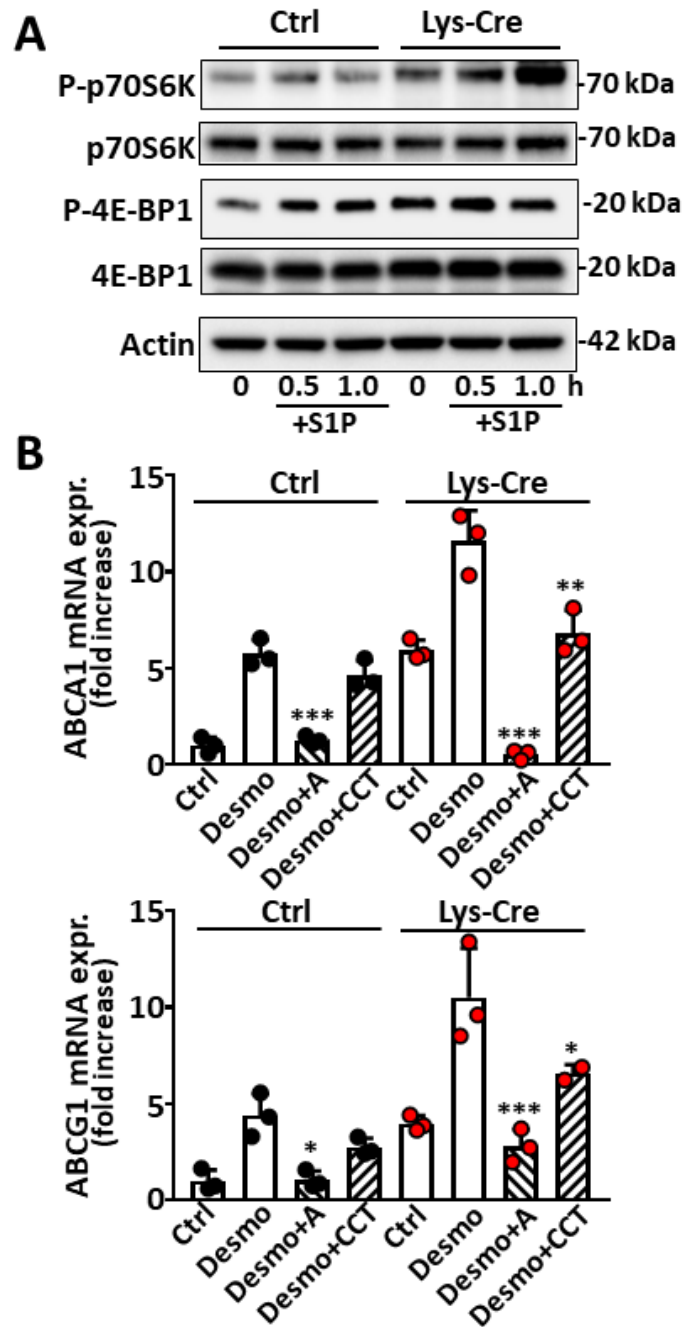

**Supplemental Figure 9. Stimulatory effects of S1P on mTOR pathway and the involvement of Akt isoforms** – PM from *S1pr1-KI* (Ctrl) or *S1pr1-LysMCre* (Lys-Cre) mice fed ND were established in culture. **A.** PM were exposed to S1P (0.5 and 1.0  $\mu\text{mol/L}$ ) for indicated times. Cell lysates were probed with antibodies against total and phosphorylated (P) p70S6 kinase or 4E-BP1. Blots are representative for 2 independent experiments. **B.** Cells ( $n=3$  pro group) were exposed for 30 min to inhibitors of Akt1 A-674563 (A, 50.0  $\text{nmol/L}$ ) or Akt2 CCT-128930 (CCT, 10.0  $\mu\text{mol/L}$ ) prior to incubation with desmosterol (50  $\mu\text{mol/L}$ ) for 24 h. *Abca1* and *Abcg1* genes analyzed by qPCR. \* -  $p<0.05$ , \*\* -  $p<0.01$ , \*\*\* -  $p<0.001$  with vs. without treatment with inhibitor (ANOVA).

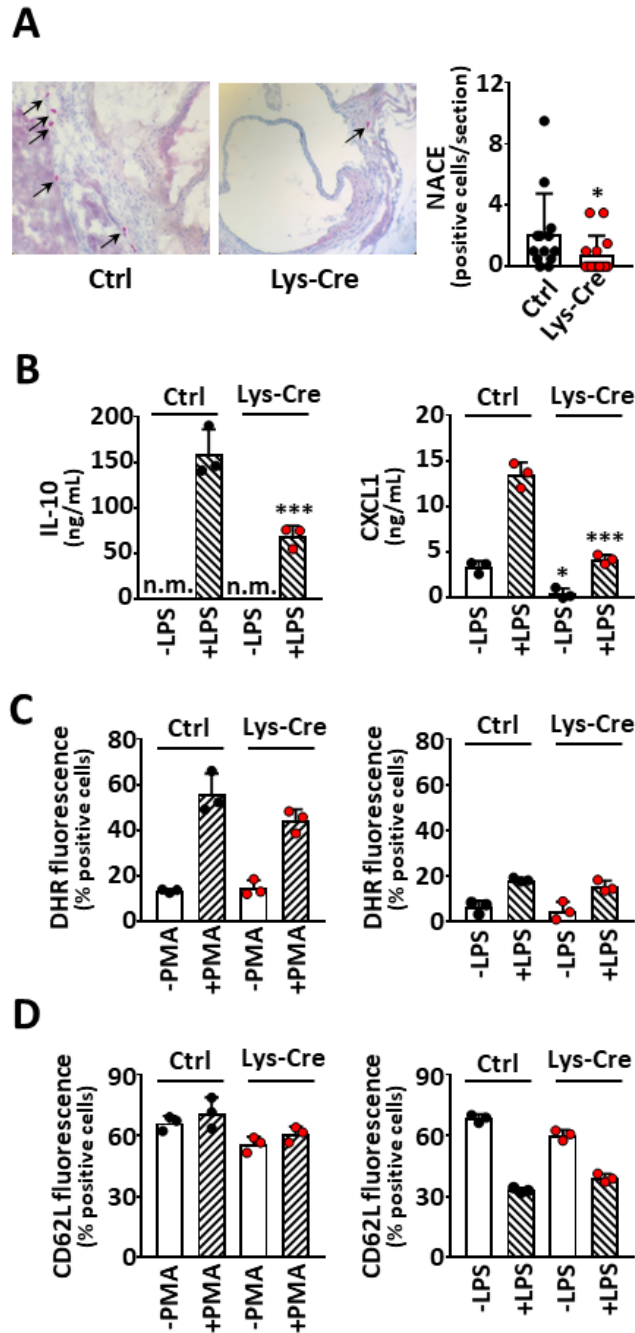

**Supplemental Figure 10. Effect of  $S1P_1$  overexpression in neutrophils on their atherosclerotic plaque content and activation** – **A**. Aortic root sections from Western diet-fed LDL- $R^{-/-}$  mice transplanted with  $S1pr1$ -KI (Ctrl, n=11) or  $S1pr1$ -LysMCre (Lys-Cre, n=10) bone marrow was stained for neutrophils as described under Methods. Bar graphs show the neutrophil content in plaques expressed as the percentage of lesion area. **B - D**. Neutrophils isolated from  $S1pr1$ -LysMCre (Lys-Cre, n=4 animals) or  $S1pr1$ -KI (Ctrl, n=3 animals) bone marrows were pooled and exposed to lipopolysaccharide (LPS, 1.0  $\mu$ g/mL, 3 h) or phorbol-12-myristat-13-acetat (PMA, 1.0  $\mu$ mol/L, 12 h). Cyto- or chemokine production (**B**), reactive oxygen species (ROS) production (**C**) and L-selectin (CD62L) shedding (**D**) were determined as described in Methods. Experiments were performed in triplicates. \* -  $p < 0.05$ , \*\* -  $p < 0.01$  \*\*\* -  $p < 0.001$  (Lys-Cre vs. Ctrl, one-way ANOVA except **A** Mann-Whitney U test).

## SUPPLEMENTAL TABLES

**Supplemental Table 1.** Red and white blood cell parameters and leukocyte distribution in mice overexpressing S1P<sub>1</sub>

| <i>Parameter</i>                                 | <i>S1pr1-KI</i> |            | <i>S1pr1-LysMCre</i> |               | <i>S1pr1-F4/80Cre</i> |               |
|--------------------------------------------------|-----------------|------------|----------------------|---------------|-----------------------|---------------|
|                                                  | ND (n=8-10)     | WD (n=11)  | ND (n=9-10)          | WD (n=10)     | ND (n=9-10)           | WD (n=10)     |
| Red blood cells (T/L)                            | 9.5 ± 0.9       | 8.2 ± 3.4  | 5.4 ± 0.6***         | 3.6 ± 0.8***  | 8.0 ± 1.4**           | 5.5 ± 0.9***  |
| Hemoglobin (g/dL)                                | 14.6 ± 1.4      | 12.3 ± 1.1 | 10.0 ± 1.4***        | 5.3 ± 1.7***  | 13.3 ± 1.0            | 9.2 ± 1.6***  |
| Hematocrit (%)                                   | 48.5 ± 5.8      | 43.1 ± 4.2 | 33.3 ± 4.2***        | 22.5 ± 5.7*** | 44.1 ± 6.7            | 34.3 ± 5.6*** |
| Mean Corpuscular Volume (fL)                     | 50.3 ± 4.0      | 52.9 ± 1.3 | 61.4 ± 4.3***        | 77.5 ± 7.6*** | 55.5 ± 1.6**          | 61.4 ± 2.6*** |
| Mean Corpuscular Haemoglobin (pg)                | 15.2 ± 1.5      | 15.2 ± 0.4 | 18.4 ± 1.8**         | 17.1 ± 1.0*** | 17.0 ± 2.1            | 16.7 ± 0.4*** |
| Mean Corpuscular Hemoglobin Concentration (g/dL) | 30.3 ± 1.9      | 28.7 ± 0.9 | 30.1 ± 3.7           | 22.3 ± 2.8*** | 30.6 ± 3.0            | 27.2 ± 0.8*** |
| White blood cells (G/L)                          | 3.6 ± 1.0       | 8.2 ± 3.3  | 4.9 ± 2.0            | 10.4 ± 2.7    | 4.0 ± 1.3             | 9.0 ± 1.9     |
| Neutrophils (%)                                  | 8.1 ± 2.5       | 7.8 ± 2.7  | 19.2 ± 11.0*         | 10.7 ± 4.3    | 10.8 ± 4.1            | 9.2 ± 3.2     |
| Monocytes (%)                                    | 1.9 ± 1.8       | 4.5 ± 2.1  | 8.4 ± 2.3***         | 15.6 ± 5.6*** | 2.0 ± 1.4             | 5.2 ± 1.2     |
| Lymphocytes (%)                                  | 89.1 ± 4.4      | 87.0 ± 2.5 | 71.7 ± 12.9***       | 73.6 ± 5.2*** | 86.8 ± 5.5            | 85.6 ± 3.5    |
| Platelets (G/L)                                  | 1251 ± 381      | 611 ± 246  | 1002 ± 587           | 230 ± 154**   | 1162 ± 226            | 570 ± 291     |
| Ly6G <sup>+</sup> /CD11b <sup>+</sup> (%)        | 5.0 ± 2.6       | 4.5 ± 2.1  | 14.7 ± 6.2***        | 13.3 ± 3.7*** | 4.9 ± 2.0             | 4.4 ± 1.6     |
| CD115 <sup>+</sup> /CD11b <sup>+</sup> (%)       | 5.1 ± 1.8       | 5.4 ± 1.9  | 14.0 ± 5.1***        | 13.7 ± 5.3*** | 5.7 ± 1.1             | 5.5 ± 1.5     |
| B220 <sup>+</sup> (%)                            | 35.1 ± 11.2     | 57.2 ± 4.1 | 31.3 ± 8.1           | 51.0 ± 5.8    | 31.2 ± 6.5            | 56.1 ± 4.4    |
| CD3 <sup>+</sup> (%)                             | 37.2 ± 6.1      | 26.4 ± 3.9 | 28.6 ± 3.6*          | 23.2 ± 5.5    | 40.2 ± 8.6            | 24.4 ± 4.3    |
| CD4 <sup>+</sup> /CD3 <sup>+</sup> (%)           | 64.8 ± 4.5      | 46.9 ± 3.7 | 63.6 ± 2.5           | 46.9 ± 3.5    | 61.3 ± 3.3            | 49.3 ± 5.7    |
| CD8 <sup>+</sup> /CD3 <sup>+</sup> (%)           | 32.0 ± 4.2      | 49.9 ± 4.2 | 33.5 ± 2.1           | 48.0 ± 4.3    | 34.0 ± 3.2            | 47.4 ± 5.4    |

Data represent means ± SD. \* - p<0.05, \*\* - p<0.01, \*\*\* - p<0.001 (S1pr1-LysMCre vs. S1pr1-KI or S1pr1-F4/80Cre vs. S1pr1-KI, ANOVA except for RBC/WD, WBC/ND, MCV/WD, MCHC/ND, MCHC/WD and Monocytes/ND: Kruskal-Wallis h-test). ND – normal diet. WD – Western diet. For neutrophils, lymphocytes, and monocytes from S1pr1-LysMCre mice on WD n=6.

**Supplemental Table 2.** Body weights and plasma lipid concentrations

|                           | <b><i>S1pr1-KI</i></b><br>(n=11) | <b><i>S1pr1-LysMCre</i></b><br>(n=10) | <b><i>S1pr1-F4/80Cre</i></b><br>(n=10) |
|---------------------------|----------------------------------|---------------------------------------|----------------------------------------|
| Body weight (g)           | 22.9 ± 2.0                       | 21.2 ± 1.6                            | 22.3 ± 1.4                             |
| Total cholesterol (mg/dL) | 1373 ± 247                       | 1351 ± 355                            | 1309 ± 320                             |
| HDL-Cholesterol (mg/dL)   | 87.1 ± 13.6                      | 94.6 ± 12.1                           | 84.5 ± 17.8                            |
| Triglycerides (mg/dL)     | 360 ± 128                        | 330 ± 111                             | 292 ± 106                              |
| S1P (μmol/L)              | 2.19 ± 0.47                      | 1.83 ± 0.60                           | 1.63 ± 0.65                            |

Data represent means ± SD. For S1P n=6

**Supplemental Table 3. List of PCR primers used in the study**

| Gene                                         | Forward primer          | Reverse primer            |
|----------------------------------------------|-------------------------|---------------------------|
| <b>Expression studies</b>                    |                         |                           |
| <i>Abca1</i>                                 | GGACATGCACAAGGTCCTGA    | CAGAAAATCCTGGAGCTTCAAA    |
| <i>Abcg1</i>                                 | CTGAAAAGAATGGGTGTTGG    | ACCTGGACAGGAAAGAATCC      |
| <i>Adamts1</i>                               | CATAACAATGCTGCTATGTGCG  | TGTCCGGCTGCAACTTCAG       |
| <i>Arg1</i>                                  | CGATTCACCTGAGCTTTGAT    | AAGCCAAGGTTAAAGCCACT      |
| <i>Axl1</i>                                  | GAAGGTCAGCTCAATCAGGA    | GTCAGAGCCCTGAAAACAGA      |
| <i>Bcl6</i>                                  | CACACCCGTCCATCATTGAA    | TGTCCTCACGGTGCCTTTTT      |
| <i>Cebpa (C/EBP<math>\alpha</math>)</i>      | GCGGGAACGCAACAACATC     | GTCACTGGTCAACTCCAGCAC     |
| <i>Cd163</i>                                 | GCAAAAACCTGGCAGTGGG     | GTCAAATCACAGACGGAGC       |
| <i>Cd68</i>                                  | TGTCTGATCTTGCTAGGACCG   | GAGAGTAACGGCCTTTTTGTGA    |
| <i>Chil3 (YM1)</i>                           | CCAGCAGAAGCTCTCCAGAAGCA | TGGTAGGAAGATCCCAGCTGTACG  |
| <i>Ciita (MHC-II)</i>                        | GACGCTCAACTGTCCAAAAAC   | GCAGCCGTGAACTTGTGTAAC     |
| <i>Csf1r (CD115)</i>                         | TGGATGCCTGTGAATGGCTCTG  | GTGGGTGTCATTCCAAACCTGC    |
| <i>Ctsc</i>                                  | GCCATTCCTCCTTCTTCTTC    | CTAGCAATTCGCGAGTGATT      |
| <i>Ctsk</i>                                  | CATGGTGAGCTTTGCTCTGT    | CCAGGTTATGGGCAGAGATT      |
| <i>Egr1</i>                                  | ACAGCAGTCCCATCTACTCG    | CTCCCTGTTGTTGTGGAAAC      |
| <i>Retnla (Fizz-1)</i>                       | CCAATCCAGCTAACTATCCCTCC | ACCCAGTAGCAGTCATCCCA      |
| <i>Gapdh</i>                                 | CTGGAGAAACCTGCCAAGTA    | TGTTGCTGTAGCCGATTCA       |
| <i>Gas6</i>                                  | CCTACCAAGTCTTCGAGGAG    | CACATTTGGCGAAATCTGGG      |
| <i>Hmox1</i>                                 | TGATGGCTTCCTTGACCAT     | CTCGTGAGACGCTTTACAT       |
| <i>Il5</i>                                   | CTGGCCTCAAACCTGGTAATG   | TGAGGGGGAGGGAGTATAAC      |
| <i>Il10</i>                                  | TGTCAAATTCATTCATGGCCT   | ATCGATTTCTCCCCTGTGAA      |
| <i>Irf8</i>                                  | AGACCATGTTCCGTATCCCCT   | CACAGCGTAACCTCGTCTTCC     |
| <i>Klf4</i>                                  | TCAAGTCCCAGCAAGTCAG     | AAACTTCCAGTCACCCCTTG      |
| <i>Lgmn</i>                                  | TGCTACCAGGAGGCTGTAAC    | TTGTCCATGGCCATCTCTAT      |
| <i>Nr1h3 (LXR<math>\alpha</math>)</i>        | TGAGAGCATCACCTTCTCA     | TGGAGAACTCAAAGATGGGG      |
| <i>Nr1h2 (LXR<math>\beta</math>)</i>         | ATTAAGGAAGAGGGGCAGGA    | GCTGAGCACGTTGTAGTGGA      |
| <i>Mafb</i>                                  | GAGCGAGCAGAGTTTCAGTC    | AGCTTGCTGCTACCTTCTCA      |
| <i>Mertk</i>                                 | CGCCAAGGCCGCTT          | TCGGTCCGCCAGGCT           |
| <i>Mmp2</i>                                  | CAAGTTCCTCCGGCGATGTC    | TTCTGGTCAAGGTCACCTGTC     |
| <i>Mmp9</i>                                  | CTGGACAGCCAGACACTAAAG   | CTCGCGGCAAGTCTTCAGAG      |
| <i>Selplg (PSGL-1)</i>                       | CTTCCTTGCTGCTGACCAT     | TCAGGGTCTCAAAATCGTCATC    |
| <i>Spi1 (PU.1)</i>                           | CCTACATGCCCGGATGTGC     | TGCTGTCCTTCATGTCGCCG      |
| <i>S1pr1</i>                                 | TTCCATCTGCTGCTTCATCATCC | GGTCCGAGAGGGCTAGGTTG      |
| <i>Timp2</i>                                 | TCAGAGCCAAAGCAGTGAGC    | GCCGTGTAGATAAACTCGATGC    |
| <b>Chromatin immunoprecipitation studies</b> |                         |                           |
| <i>Abca1 promoter</i>                        | GGGGAAAGAGGGAGAGAACAG   | GAATTACTGGTTTTTGCCGC      |
| <i>Abcg1 promoter</i>                        | CCATTAGCTGACTGTGAGCAT   | GGGCAGGCAAGTGGTTGTACAT    |
| <i>Arg1 promoter</i>                         | TGCTCCGTTTCGATTCTTCT    | TCGTGTGCCAAGTGCTATTC      |
| <i>Ciita promoter</i>                        | CCTAACCATTTCCGTTTCATC   | ACCTCTGTTGTGAGTGTAGCCTTCT |
| <i>Csf1r promoter</i>                        | CTGCTGCTGGCCACAGTTT     | CAGCGATGCCCTCTTTGC        |
| <i>Il5 promoter</i>                          | TCCGCCATATATGCACAACCT   | TTAACATCTTGACCCCCACCC     |



**Supplemental Table 4.** List of fluorescent-labeled antibodies used in the study

| <b>Antibody</b> | <b>Chromophore</b> | <b>Ordering Number</b> | <b>Supplier</b>            |
|-----------------|--------------------|------------------------|----------------------------|
| <b>PU.1</b>     | AlexaFluor488      | 681305                 | BioLegend                  |
| <b>IRF8</b>     | PE                 | 12-9852-82             | eBioscience (ThermoFisher) |
| <b>MHCII</b>    | PE                 | 107607                 | BioLegend                  |
| <b>CD115</b>    | PE                 | 135505                 | BioLegend                  |
| <b>F4/80</b>    | FITC               | 123107                 | BioLegend                  |
|                 | APC                | 123115                 | BioLegend                  |
| <b>CD206</b>    | FITC               | 141703                 | BioLegend                  |
| <b>CD86</b>     | APC                | 105011                 | BioLegend                  |
| <b>CD93</b>     | APC                | 136509                 | BioLegend                  |
| <b>PU.1</b>     | AlexaFluor488      | 681305                 | BioLegend                  |
| <b>IRF8</b>     | PE                 | 12-9852-82             | eBioscience (ThermoFisher) |
| <b>MerTK</b>    | PE                 | 151505                 | BioLegend                  |
| <b>Axl1</b>     | AlexaFluor647      | 51-1621-82             | eBioscience (ThermoFisher) |
| <b>pAKT</b>     | PE                 | 12-9715-42             | eBioscience (ThermoFisher) |
| <b>pSTAT3</b>   | AlexaFluor488      | 651005                 | BioLegend                  |
| <b>pSTAT6</b>   | PE                 | 12-9013-42             | eBioscience (ThermoFisher) |
| <b>CD244</b>    | FITC               | 133503                 | BioLegend                  |
| <b>CD226</b>    | PE                 | 128805                 | BioLegend                  |
| <b>CD36</b>     | APC                | 102611                 | BioLegend                  |
| <b>CD4</b>      | FITC               | 100509                 | BioLegend                  |
| <b>CD3</b>      | PE                 | 100205                 | BioLegend                  |
| <b>CD8a</b>     | APC                | 100711                 | BioLegend                  |
| <b>CD11b</b>    | PE                 | 101207                 | BioLegend                  |
|                 | APC-Cy7            | 101225                 | BioLegend                  |
|                 | BV 421             | 101235                 | BioLegend                  |
|                 | FITC               | 101205                 | BioLegend                  |
| <b>B220</b>     | APC-Cy7            | 103223                 | BioLegend                  |
| <b>Ly6G</b>     | APC-Cy7            | 127623                 | BioLegend                  |
|                 | PE                 | 127608                 | BioLegend                  |
|                 | FITC               | 127606                 | BioLegend                  |
| <b>Ly6C</b>     | AlexaFluor647      | 128009                 | BioLegend                  |
|                 | PE                 | 128007                 | BioLegend                  |
| <b>CD62</b>     | APC                | 104411                 | BioLegend                  |

**Supplemental Table 5.** List of ELISA reagents used in the study.

| <b>Cytokine/chemokine</b>         | <b>Ordering number</b>                                  | <b>Company</b> | <b>Sample dilution</b>                |
|-----------------------------------|---------------------------------------------------------|----------------|---------------------------------------|
| <b>IL-10</b>                      | M1000B<br>Mouse IL-10<br>Quantikine ELISA Kit<br>431107 | BioTechne      | 1:2<br>(according to<br>manufacturer) |
| <b>IL-4</b>                       | LEGEND MAX Mouse<br>IL-4 Kit<br>MRA00                   | BioLegend      | not diluted<br>(1:2 if needed)        |
| <b>IL-1RA</b>                     | Mouse IL-1RA<br>Quantikine ELISA Kit                    | BioTechne      | not diluted                           |
| <b>IL-5</b>                       | M5000<br>Mouse IL-5<br>Quantikine ELISA Kit             | BioTechne      | not diluted                           |
| <b>CCL22</b>                      | MCC220<br>Mouse CCL22<br>Quantikine ELISA Kit           | BioTechne      | 1:3<br>(according to<br>manufacturer) |
| <b>TNF<math>\alpha</math></b>     | MTA00b<br>Mouse TNF $\alpha$<br>Quantikine ELISA Kit    | BioTechne      | not diluted                           |
| <b>IL-6</b>                       | M6000B-1<br>Mouse IL-6<br>Quantikine ELISA Kit          | BioTechne      | not diluted                           |
| <b>CCL5/RANTES</b>                | MMR00<br>Mouse/Rat CCL5<br>Quantikine ELISA Kit         | BioTechne      | not diluted<br>(1:2 if needed)        |
| <b>KC1/GRO<math>\alpha</math></b> | 447507<br>Mouse CXCL1<br>LegendMax ELISA Kit            | BioLegend      | not diluted                           |
