# Supplementary material for: Sphingosine 1-phosphate receptor 1 signaling in macrophages reduces atherosclerosis in LDL receptor–deficient mice
Source: PubMed Central journal article supplement (PMC11665566; doi:10.1172/jci.insight.158127), 2024-11-12

**Main Text – Fig. 6C**

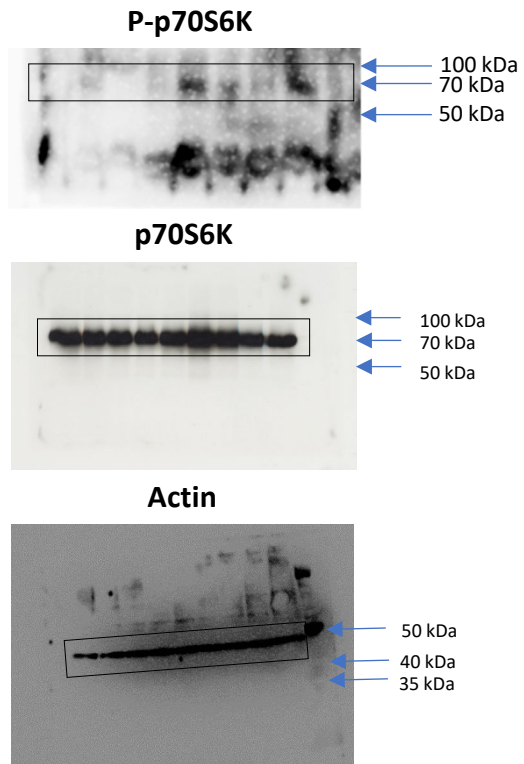

**Supplemental Material – Fig. 1C**

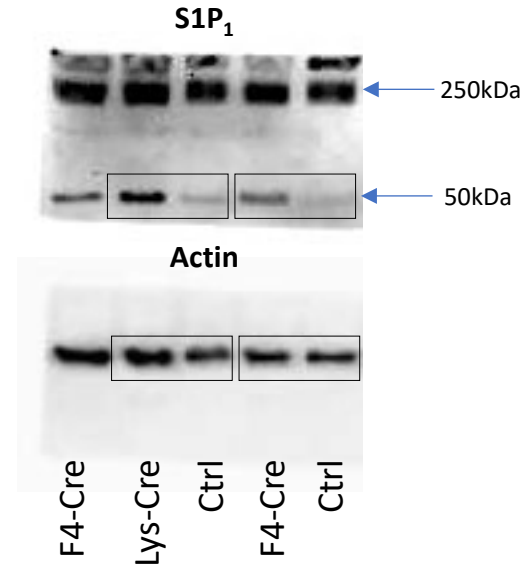

Supplemental Material – Fig. 9A

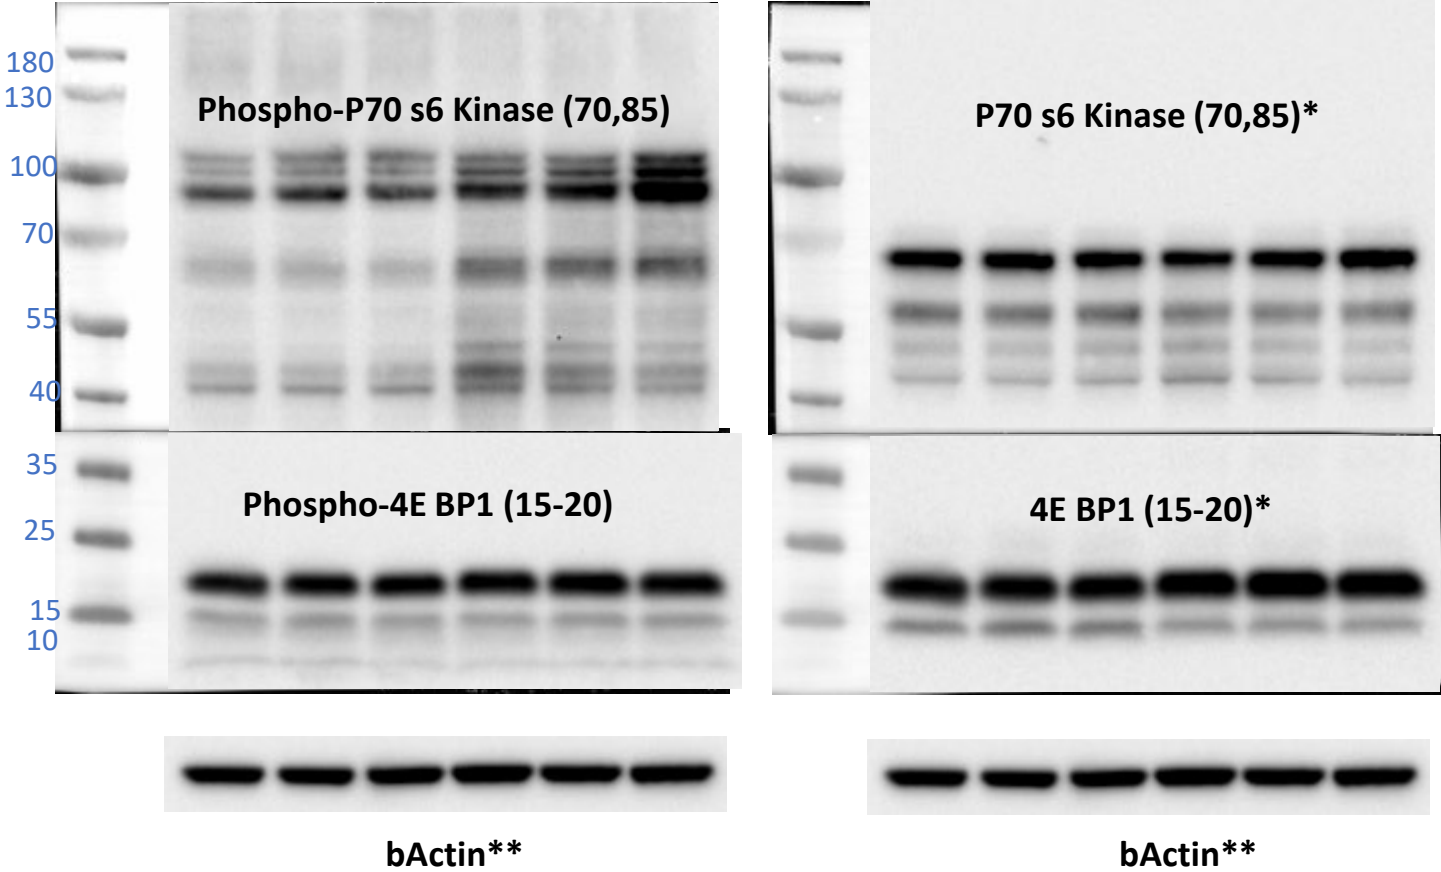

Supplement: jciinsight-9-158127-s009.pdf [file jciinsight-9-158127-s009.pdf]
